1 **SWI/SNF chromatin remodeling determines brassinosteroid-induced**  
2 **transcriptional activation**

3

4 Tao Zhu<sup>1</sup>, Chuangqi Wei<sup>2</sup>, Yaoguang Yu<sup>1</sup>, Jiameng Zhu<sup>1</sup>, Zhenwei Liang<sup>1</sup>, Yuhai Cui<sup>3</sup>,  
5 Zhi-Yong Wang<sup>2,\*</sup> and Chenlong Li<sup>1,\*</sup>

6

7 <sup>1</sup> State Key Laboratory of Biocontrol, Guangdong Provincial Key Laboratory of Plant  
8 Resource, School of Life Sciences, Sun Yat-Sen University, Guangzhou, 510275, China

9 <sup>2</sup> Department of Plant Biology, Carnegie Institution for Science, Stanford, California,  
10 94305, USA

11 <sup>3</sup> London Research and Development Centre, Agriculture and Agri-Food Canada,  
12 London, Ontario, N5V 4T3, Canada

13

14 \*: Corresponding authors: [lichlong3@mail.sysu.edu.cn](mailto:lichlong3@mail.sysu.edu.cn) and  
15 [zwang@carnegiescience.edu](mailto:zwang@carnegiescience.edu)

16

17

18

19

20

21

22

23

24

25

26

27

28

29

30 **Abstract**

31 The brassinosteroid (BR) hormone is a central modulator of plant growth, development,  
32 and responses to stresses by activating or repressing the expression of thousands of  
33 genes through the transcription factor BRASSINAZOLE-RESISTANT 1 (BZR1) and  
34 its homologues. However, the molecular mechanism that determines the transcriptional  
35 activation versus repression activity of BZR1 remains largely unclear. Here, we show  
36 that BZR1-responsive transcriptional activation at thousands of loci requires the Switch  
37 defective/sucrose non-fermentable (SWI/SNF)-complexes-mediated chromatin  
38 accessibility regulation. BR-activated BZR1 controls the activation or repression of  
39 thousands of BZR1 target genes through reprogramming genome-wide chromatin  
40 accessibility landscape in *Arabidopsis thaliana*. BZR1 physically interacts with the  
41 BRAHMA (BRM)-Associated SWI/SNF complexes (BAS), co-localizes with BRM on  
42 the genome, and enhances BRM occupancy at sites of increased accessibility by BR.  
43 Loss of BRM abrogates the capacity of BZR1 to increase but not decrease chromatin  
44 accessibility, blocks BR-induced hypocotyl elongation, and diminishes BZR1-mediated  
45 transcriptional activation rather than repression. Together, our work reveals that the  
46 BAS chromatin remodeling complex is a critical epigenetic regulatory partner in  
47 dictating BZR1-mediated transcriptional activation ability, thus providing a long-  
48 sought mechanistic explanation for how BR signaling activates gene transcription in  
49 shaping diverse developmental programs.

50

51 **Teaser:** BZR1-responsive transcriptional activation activity at thousands of loci  
52 requires the SWI/SNF-complexes-mediated chromatin accessibility regulation.

53

54 **Keywords:** Brassinosteroid, BZR1, SWI/SNF complexes, Chromatin accessibility,  
55 Hypocotyl elongation

56

57

58

59

## 60 **Introduction**

61 To ensure survival, plants must sense and respond to various environmental signals (*1*).  
62 Thus, plants need efficient ways to communicate between cells and cooperate within  
63 tissues in the developmental responses to external signals. Many signaling molecules  
64 are used to accomplish this process. One such class of signaling molecules is BR, a  
65 polyhydroxylated steroidal hormone involved in diverse growth and development  
66 processes (*2, 3*). BR is recognized by the extracellular leucine-rich repeat (LRR)  
67 domains of cell transmembrane receptor kinase BRASSINOSTEROID-INSENSITIVE  
68 1 (BRI1). BR binding enhances BRI1 heteromerization with BRI1-associated kinase 1  
69 (BAK1) (*4, 5*), which triggers a series of phosphorylation events and the activation of  
70 BR-SIGNALING KINASE 1 (BSK1) and CONSTITUTIVE DIFFERENTIAL  
71 GROWTH 1 (CDG1) (*6, 7*). BSK1 and CDG1 further activates BRI-SUPPRESSOR 1  
72 (BSU1) family phosphatases (*7*). The activated BSU1 dephosphorylates and inactivates  
73 the primary negative regulator GLYCOGEN SYNTHASE KINASE 3 (GSK3)-like  
74 kinase BRASSINOSTEROID-INSENSITIVE 2 (BIN2) (*8*), leading to the  
75 dephosphorylation and activation of master transcription factors BRASSINAOLE-  
76 RESISTANT 1 (BZR1) and BRI-EMS-SUPPRESSOR 1 (BES1) by PROTEIN  
77 PHOSPHATASE 2A (PP2A) (*9*). The dephosphorylated BZR1 and BES1 are  
78 transported to the nucleus to achieve transcriptional regulation of thousands of BR-  
79 responsive genes.

80 BZR1 is atypical basic helix–loop–helix (bHLH) transcription factor that  
81 functions in orchestrating diverse developmental and physiological processes (*2, 3, 10*).  
82 For example, BZR1 is an essential component of the transcriptional activation module  
83 that regulates hypocotyl elongation in response to light, temperature, auxin, gibberellin,  
84 and sugar (*11-14*). The gradient of BZR1 activity in the root tip controls the balance of  
85 stem cell maintenance and differentiation in the root meristem (*15*), whereas its  
86 activities in specific cell types regulates xylem differentiation, cell division, and  
87 symbiosis (*16, 17*). BZR1-mediated transcriptional activation is also required for  
88 fertility and plays specific roles in the development of anther, pollen, and seed (*18, 19*).  
89 In the shoot meristem, BZR1 represses organ boundary identity genes to regulate shoot

90 architecture (20). Beyond their roles in growth and development, BZR1 plays roles in  
91 regulating immune responses and balancing the trade-off between growth and  
92 immunity (21-24). There is also evidence that BZR1 is involved in acclimation to heat,  
93 cold, and drought stresses (10, 11, 25, 26). These observations underscore the  
94 essentiality of transcriptional regulation mediated by BR-BZR1 signaling in the context  
95 of plant growth, development, and immune responses.

96 Although it has been known for decades that BZR1 and BES1 transcription factors  
97 can either activate or repress BR-responsive genes (10), the mechanistic basis of this  
98 dichotomy is still poorly understood. Current evidence suggests that different cis-  
99 elements might be related to the activation and repression ability of BZR1. Indeed,  
100 earlier studies showed that BZR1-induced genes enrich E-box (CANNTG) motif,  
101 whereas BZR1-repressed genes enrich BR-response elements (BRRE, CGTG(T/C)G)  
102 (11, 27, 28). Intriguingly, two nucleobases flanking the core binding G-box (CACGTG)  
103 motif were recently proposed by analysis of in vitro DNA affinity purification  
104 sequencing (DAP-seq) data to be responsible for BZR1-responsive transcriptional  
105 repression rather than transcriptional activation (29). However, whether and how cis-  
106 elements may contribute to distinguish transcriptional activation from repression  
107 activity of BZR1 remain undetermined. Interestingly, BZR1 was shown to interact with  
108 transcriptional co-repressor TOPLESS (TPL) family proteins through its ERF-  
109 associated amphiphilic repression (EAR) domain and recruits TPL to BZR1-repressed  
110 genes (30). The BZR1-TPL complex further allows the recruitment of Histone  
111 deacetylase 19 (HDA19) to mediate histone deacetylation and thus mediates BR-  
112 responsive gene repression (30). Notably, BZR1 has been reported to activate several  
113 cell elongation-related genes by linking to the PICKLE chromatin remodeler (31).  
114 Additionally, BZR1 was shown to induce floral repressor *FLOWERING LOCUS C*  
115 (*FLC*) in connection with the histone 3 lysine 27 (H3K27) demethylase EARLY  
116 *FLOWERING 6* (32). Transcription factors PHYTOCHROME INTERACTING  
117 FACTOR 4 (PIF4), BLUE-LIGHT INHIBITOR OF CRYPTOCHROMES1 (BIC1),  
118 and AUXIN RESPONSE FACTOR 6 (ARF6) were shown to interact with BZR1 and  
119 cooperatively up-regulate genes involved in cell elongation in response to light and

120 temperature signaling (11, 13, 33). However, the fundamental principle determining  
121 BZR1-mediated transcriptional activation is still largely unknown.

122 Chromatin accessibility is crucial in regulating gene expression and has a dynamic  
123 response to endogenous and exogenous signals (34). In eukaryotes, the adenosine  
124 triphosphate (ATP)-dependent chromatin-remodeling enzymes disrupt histone contacts  
125 and translocate DNA around the nucleosome to slide, evict, exchange or assemble the  
126 histone octamer, thus regulating the accessibility to DNA (35-37). Switch  
127 defective/sucrose non-fermentable (SWI/SNF) complexes are chromatin remodelers  
128 responsible for increasing DNA accessibility (38). Active regulatory DNA regions  
129 require continuous chromatin remodeling activity of SWI/SNF complexes; therefore,  
130 their activities must be tightly regulated to ensure fidelity and plasticity of genomic  
131 processes (39, 40). In *Arabidopsis*, three subclasses of SWI/SNF chromatin remodeling  
132 complexes were identified: BRM-associated SWI/SNF complexes (BAS), SPLAYED-  
133 associated SWI/SNF complexes (SAS), and MINUSCULE-associated SWI/SNF  
134 complexes (MAS) (41, 42). However, the molecular mechanisms responsible for the  
135 precise localization of SWI/SNF chromatin remodeling complexes to specific genomic  
136 loci, therefore ensuring their proper activity during the intricate processes of growth  
137 and development, remain obscure. Although both SWI/SNF and BR are vital for diverse  
138 plant developmental processes, no direct molecular connection has been established  
139 between SWI/SNF-mediated genome accessibility regulation and BR-directed dynamic  
140 hormone signaling network during development.

141 In this study, we demonstrate that BAS-type SWI/SNF complexes are required for  
142 BR signaling to mediate chromatin accessibility landscape of thousands of loci to  
143 dictate BR-responsive transcriptional activation. We show that BZR1 physically  
144 interacts with BAS-complexes subunits and co-localizes extensively with BAS on the  
145 genome, with higher BRM enrichment at sites where BR increases chromatin  
146 accessibility. BR signaling enhances BRM occupancy at BZR1-increased accessible  
147 loci. Loss of BRM nearly completely abolishes BZR1-mediated increase rather than  
148 decrease, of chromatin accessibility. Consistently, genetic disruption of BRM blocks  
149 BZR1-mediated hypocotyl elongation in the dark and gene transcriptional activation

150 but not repression activity, highlighting SWI/SNF chromatin remodeler complexes as  
151 specific and critical regulators of BR-mediated gene activation. In summary, our  
152 findings unravel that the BAS chromatin remodeling complex is a critical epigenetic  
153 regulatory partner that determines the transcriptional activation activity of BZR1 in the  
154 BR signaling pathway. Our work also sheds light on hormone information in directing  
155 global epigenome activation, with broad relevance for the developmental control of  
156 plants.

157

## 158 **Results**

### 159 **BR-BZR1 signaling modulates chromatin accessibility landscape**

160 To explore how BR signaling might regulate the chromatin accessibility landscape, we  
161 harvested Col wild-type (WT) and *bri1-701* mutant Arabidopsis seedlings grown in the  
162 dark for five days and performed assay for transposase-accessible chromatin by  
163 sequencing (ATAC-seq). We identified 2,658 differentially accessible regions (DARs,  
164  $|\log_2 \text{fold change}| \geq 0.4$ ) between Col and *bri1-701*, of which 57% and 43% showed  
165 decreased and increased accessibility, respectively, in *bri1-701* mutants (Fig. 1, A to D  
166 and fig. S1, A and B and table S1). DARs were predominantly located in regions near  
167 the transcription initiation sites (TSSs) of genes (Fig. 1E). These results suggest that  
168 BR has a dual function in regulating TSS chromatin accessibility, probably  
169 underscoring the dual role of BR to activate and repress gene transcription.

170 Next, we wondered whether these changes in chromatin accessibility were directly  
171 regulated by BZR1. Using the CentriMo motif analysis pipeline (43), we found that  
172 BR-regulated chromatin accessibility regions significantly enriched for sequences  
173 containing the core G-box (CACGTG) motif (fig. S1C). Further analysis of regions  
174 with decreased or increased accessibility in the *bri1-701* mutants showed that G-boxes  
175 recognized by BZR1 significantly enriched within both groups (Fig. 1, F and G). We  
176 then carried out chromatin immunoprecipitation followed by high-throughput  
177 sequencing (ChIP-seq) using Arabidopsis transgenic lines expressing yellow  
178 fluorescence protein (YFP)-tagged BZR1 under the control of its native promoter in the  
179 Col background (*ProBZR1:BZR1-YFP*) to identify BZR1-enriched genes in the 5-day-

180 old seedlings grown in the dark conditions (table S2). Consistent with the previous  
181 ChIP-seq data for BZR1, the known BZR1 target genes were observed in our dataset  
182 (fig. S1, D and E). We found that 80.3% of the decreased DARs in *bri1-701* (1,217 out  
183 of 1,514 peaks) overlapped with the BZR1-binding regions (Fig. 1H). Significant  
184 overlap between the increased DARs in *bri1-701* and the BZR1-binding regions (738  
185 out of 1144 peaks, 64.5%) was also observed (Fig. 1H). Consistently, a highly  
186 significant enrichment in ChIP-seq signals for BZR1 was showed at the centers of the  
187 increased or decreased DARs (Fig. 1I). Furthermore, 60% of BZR1-targeted DAR them  
188 had reduced accessibility, while 40% showed increased accessibility in the *bri1-701*  
189 mutants (fig. S1F). Together, these results support the direct role of BZR1 both in  
190 increasing and decreasing chromatin accessibility in plants.

191 We next assessed whether changes in chromatin accessibility caused by BR-  
192 signaling-deficiency are correlated with changes in expression. Transcriptome profiling  
193 by RNA-seq identified a total of 1,729 genes ( $|\log_2 \text{ fold change}| \geq 1$ ) that were  
194 dysregulated in the *bri1-701* mutants, of which 875 and 854 showed down-regulated  
195 and up-regulated, respectively (fig. S1G and table S3). We found that decreased and  
196 increased DAR genes were significant enriched among genes with decreased and  
197 increased expression in the *bri1-701* mutants, respectively (fig. S1H). Moreover, the  
198 transcription of the decreased and increased DAR genes was down-regulated and up-  
199 regulated, respectively, in the *bri1-701* mutants (fig. S1I). We further divided the top  
200 500 genes that showed dysregulated chromatin accessibility in the *bri1-701* mutants  
201 into five fractions according to the degree of the change and analyzed the corresponding  
202 changes in RNA expression. We found a positive correlation between the magnitude of  
203 changes in the *bri1-701* mutants for chromatin accessibility and gene expression (Fig.  
204 1, J and K). These positive correlations were exemplified at individual loci (Fig. 1L).  
205 Thus, BR signaling pathway can activate and repress gene expression in a chromatin  
206 accessibility-dependent manner.

207 To understand the potential physiological significance of BR-mediated changes in  
208 chromatin accessibility, we identified among the reduced DAR genes the most highly  
209 down-regulated genes in the *bri1-701* mutants. The top-regulated genes were those

210 previously found to mediate cell-elongation, including *PACLOBUTRAZOL*  
211 *RESISTANCE 1 (PRE1)*, *SMALL AUXIN UPREGULATED RNA 50 (SAUR50)*, and  
212 *INDOLE-3-ACETIC ACID INDUCIBLE 19 (IAA19) (11)* (Fig. 1M), thus suggesting  
213 that enhanced chromatin accessibility by BR signaling facilitates transcriptional  
214 activation of the cell elongation processes. Gene Ontology (GO) analysis using genes  
215 showing decreased accessibility and expression in the *bri1-701* mutants revealed terms  
216 related to response to Auxin, light intensity, red or far-red light, and cell-wall  
217 organization processes (fig. S1J). In contrast, when we identified the most highly up-  
218 regulated genes in the *bri1-701* mutants among the increased DAR genes, stress-related  
219 genes such as *MYB DOMAIN PROTEIN 15 (MYB15) (44)* and *DETOXIFICATION*  
220 *EFFLUX CARRIER 50 (DTX50) (45)* were observed (Fig. 1N). GO analysis of genes  
221 with increased chromatin accessibility and transcription in the *bri1-701* mutants  
222 showed a marked excess of terms related to cellular response to hypoxia, salicylic acid,  
223 salt stress, and oxidative stress (fig. S1K). This analysis suggests that BR-mediated  
224 chromatin accessibility decrease and associated transcriptional down-regulation are  
225 involved in stress-responsive processes. Taken together, these results imply that BR-  
226 maintained genome-wide chromatin accessibility landscape regulates a gene expression  
227 axis that may balance plant growth and stress response processes.

228

### 229 **BZR1 interacts with the BAS complexes in plants**

230 We next sought to define the molecular mechanisms by which BR signaling regulates  
231 chromatin accessibility. We conducted immunoprecipitation followed by Mass  
232 spectrometry (IP/MS) using our previously described *BZR1-YFP* line and identified  
233 proteins that co-purified with BZR1 by mass spectrometry. Along with the known  
234 BZR1-interacting protein TPL (30), we identified the SWI/SNF chromatin remodeler  
235 ATPase BRM that co-purified with BZR1 (Fig. 2A). Hemagglutinin (HA)-tagged BZR1  
236 co-immunoprecipitated with FLAG-tagged BRM in *Nicotiana benthamiana* leaves (Fig.  
237 2B). Consistent with the overexpression data, the interaction between BZR1 and BRM  
238 was also detected in an Arabidopsis line expressing the BZR1-3FLAG and BRM-GFP  
239 proteins under their respective native promoters (Fig. 2C). Recent studies showed that



240 Arabidopsis SWI/SNF complexes can be divided into three types of subcomplexes,  
241 including the BRM-Associated SWI/SNF complexes (BAS) (41, 42). BAS complexes  
242 contain a series of BAS-subcomplex-specific subunits, including BRAHMA-  
243 INTERACTING PROTEINS 1/2 (BRIP1/2), BROMODOMAIN-CONTAINING  
244 PROTEIN 2/13 (BRD2/13), and SWI/SNF ASSOCIATED PROTEIN 73A (SWP73A).  
245 To further evaluate whether BZR1 forms a complex with BAS, co-immunoprecipitation  
246 (Co-IP) assays were performed to detect the interaction between BZR1 and the BAS-  
247 complex-specific subunits. HA-tagged BRIP1/2, BRD2/13, or SWP73A co-  
248 immunoprecipitated with FLAG-tagged BZR1 in *N. benthamiana* leaves (Fig. 2, D to  
249 H). In addition, bimolecular fluorescence complementation (BiFC) assays using *N.*  
250 *benthamiana* leaves detected positive fluorescent signals in nuclei when co-expressing  
251 N-terminal YFP-fused BZR1 and C-terminal YFP-fused BRM or the known BAS-  
252 specific subunits (fig. S2, A and B). Together, these results demonstrate the tethering of  
253 BZR1 to the BAS complexes to form a BZR1-containing BAS complex.

254 We next carried out yeast two-hybrid (Y2H) assays to determine how BZR1 might  
255 directly tether with the BAS complexes. These analyzes indicated that the N-terminal  
256 part of BRM (amino acids 1–952) is responsible for the direct interaction with the N-  
257 terminal domain of BZR1 (amino acids 1–109) (Fig. 2, I and J and fig. S2C). The N-  
258 terminal region of BZR1 has been shown to mediate the protein-protein interaction of  
259 BZR1 with numerous proteins (46). In addition, Y2H assays also showed that the BZR1  
260 could also directly interact with BAS-specific subunits BRIP1, BRD13 and SWP73A  
261 (Fig. 2J). Strikingly, BZR1 did not use the N-terminal domain but instead interacts with  
262 these BAS specific subunits through its C-terminal region containing the EAR domain  
263 (Fig. 2J). Further deletion analysis revealed that the EAR domain was responsible and  
264 sufficient for the interaction between BZR1 and SWP73A subunit (fig. S2, D and E).  
265 Taken together, these data suggest that BZR1 assembles into the BAS complexes  
266 through at least two mechanisms: the N-terminal domain mediates its interaction with  
267 the BRM ATPase, and its C-terminal region containing the EAR domain interacts with  
268 core module subunits including SWP73A.

269

270 **BRM co-location with BZR1 on chromatin**

271 We subsequently assessed the potential genomic interplay between BZR1 and BRM.  
272 We carried out the ChIP-seq assay using our previously reported *ProBRM:BRM-GFP*  
273 *brm-1* plants to identify BRM-occupied genes in 5-day-old seedlings grown in the dark.  
274 The sets of genes enriched by BRM (table S2) and those by BZR1 exhibited significant  
275 overlap, with 65% of the BRM-occupied genes also enriched by BZR1 (Fig. 3, A and  
276 B). Furthermore, the distribution patterns of BRM peaks over gene units and flanking  
277 intergenic regions were similar to those of BZR1 (fig. S3A), with the strongest  
278 enrichment around the TSSs of target genes (fig. S3, B and C). Of note, the G-box-like  
279 motif was the top-ranked DNA motifs enriched in BZR1-BRM co-binding sites (fig.  
280 S3D). Correlation analysis with ChIP-seq signals for BZR1 confirmed positively  
281 correlated BZR1 ( $r = 0.71$ ) co-localization with BRM (Fig. 3C). When we performed  
282 correlation analysis of ChIP-seq signal between BZR1 and BAS-specific subunits  
283 BRIP1/2 and BRD1/2/13 using our published ChIP-seq data (47, 48), we found that  
284 BZR1 also showed significantly correlated co-localization with these BAS-specific  
285 subunits (Fig. 3C). Consistently, heatmap analysis at BZR1 or BRM binding peaks  
286 showed similar enrichment patterns for BZR1, BRM, BRIP1/2, and BRD1/2/13 when  
287 we ranked the peaks by BZR1 or BRM signal, respectively (Fig. 3D, E). When we  
288 repeated the co-occupancy analysis using enrichment relative to TSSs rather than  
289 binding peaks, we found that BZR1-enriched TSSs were also substantially occupied by  
290 BRM and those BAS-specific subunits BRIP1/2 and BRD1/2/13 (fig. S3, E and F). We  
291 further compared BZR1-bound peaks ( $n = 14,372$ ) with randomly selected BZR1-  
292 unbound regions ( $n = 14,372$ ), finding a significant enrichment of BRM at BZR1-bound  
293 versus BZR1-unbound regions (Fig. 3F). Similarly, a strong enrichment of BZR1 was  
294 observed at BRM-bound ( $n = 15,565$ ) versus BRM-unbound regions ( $n = 15,565$ ) (Fig.  
295 3G).

296 Further, we explored the enrichment levels of BRM at *bri1-701* decreased and  
297 increased chromatin accessibility sites, observing a higher enrichment of BRM at *bri1-*  
298 *701* decreased chromatin accessibility sites (top 50 and top 100) compared with *bri1-*  
299 *701* increased chromatin accessibility sites (top 50 and top 100) (Fig. 3, H and I). A

300 similar trend held when we repeated the analysis using enrichment relative to TSSs (fig.  
301 S3, G and H). These results indicate that BR-dependent chromatin accessibility  
302 increased sites have higher BRM occupancy than BR-dependent chromatin  
303 accessibility decreased sites.

304 We also compared the enrichment levels of histone modifications between BZR1-  
305 BRM co-binding sites and unique BZR1-binding sites. We found that BZR1-BRM co-  
306 binding sites exhibited higher levels of activate histone modification markers, including  
307 H3K4me3, H4K5ac, H3K9ac, H3K27ac, H4K8ac, H4K12ac, H4K16ac, H3K4me2,  
308 and H3K36me3) compared with BZR1-unique binding sites (Fig. 3, J and K and fig.  
309 S4, A and C). On the contrary, BZR1-BRM co-binding sites had lower levels of  
310 repressive marker (H3K27me3) compared with BZR1 unique binding sites (Fig. 3, J  
311 and K and fig. S4C). Consistently, BZR1-BRM co-binding sites displayed a stronger  
312 Pol II enrichment relative to BZR1 unique binding sites (fig. S4, A and B). Together,  
313 these results suggest that the physical presence of BRM at the BZR1-BRM co-bound  
314 sites may prepare an active chromatin landscape for BR-mediated transcriptional  
315 activation.

316

### 317 **BRs enhance BRM targeting at *bri1-701* decreased accessibility sites**

318 Because of the higher BRM enrichment at sites showing decreased accessibility in *bri1*-  
319 *701* mutants compared with sites showing increased chromatin accessibility sites, we  
320 sought to assess the potential role of BZR1 in enhancing BAS complexes occupancy to  
321 these two chromatin regions. To this end, we used Propiconazole (PPZ), a potent BR  
322 biosynthesis inhibitor that inhibits the dephosphorylation of BZR1 and thereby  
323 preventing it from entering the nucleus (49). As expected, PPZ-treated plants showed  
324 shortened hypocotyls, reduced amounts of dephosphorylated BZR1, and decreased  
325 enrichment of BZR1 at known BZR1-target genes (fig. S5, A to D), confirming the  
326 effective blocking of the BR signaling by PPZ treatment.

327 We then carried out ChIP-seq using 5-day-old *BRM-GFP* transgenic seedlings  
328 treated with dimethyl sulfoxide (DMSO) or PPZ in the dark. PPZ treatment resulted in  
329 a significant decrease in BRM binding near the TSSs of a set of genes (top 50 and top

330 100) showing decreased chromatin accessibility in *bri1-701* mutants (Fig. 4, A and C).  
331 The enrichment of BRM also performed a significant decrease at all *bri1-701* decreased  
332 accessibility genes (fig. S6, A and B). In contrast, we did not observe significant  
333 changes in BRM binding in PPZ-treated plants at genes with increased chromatin  
334 accessibility in *bri1-701* mutants (Fig. 4, D to F and fig. S6, A and B). When we  
335 repeated the analysis using enrichment relative to binding peaks, rather than TSSs, we  
336 observed a significant decrease in BRM binding at *bri1-701* decreased accessibility  
337 genes (top 50, top 100, and all), but no significant changes in BRM binding at *bri1-701*  
338 increased accessibility genes (top 50, top 100, and all) (Fig. 4, D to F and fig. S6, C and  
339 D). At the single-gene level, genome browser snapshots of BRM ChIP-seq reads at the  
340 selected genes showed BR-deficiency-induced reduction of BRM binding at *bri1-701*  
341 decreased but not increased accessibility genes (Fig. 4G), and these results were  
342 independently validated by ChIP-qPCR analysis (Fig. 4, H and I). Notably, the BRM-  
343 GFP mRNA and protein levels were not significantly altered after PPZ treatment (Fig.  
344 4, J and K), suggesting that the observed reduction in BRM binding at *bri1-701*  
345 decreased accessibility genes upon the loss of BR signaling was not due to the changes  
346 in BRM protein abundance. In addition, we observed a significant decline of chromatin  
347 accessibility at genomic sites showing decreased BRM binding in the absence of BR  
348 signaling; however, there was no significant changes in chromatin accessibility at  
349 genomic sites with enhanced BRM binding in the absence of BR signaling (fig. S7, A  
350 to D). These data suggest that downregulation of chromatin accessibility due to BR  
351 deficiency is directly associated with decreased BRM binding. Altogether, these results  
352 highlight the role of the BZR1-BAS complex interaction in directing BAS complex  
353 localization and remodeling activities to the *bri1-701* decreased chromatin accessibility  
354 sites.

355 Finally, we wanted to identify sites showing most highly decreased BRM targeting  
356 and chromatin accessibility within *bri1-701* decreased accessibility genes as a strategy  
357 to identify gene loci that may underpin the biological relevance of BAS complexes in  
358 BR signaling pathway. We ranked the decreased BRM binding sites upon treatment of  
359 PPZ versus DMSO treatment and identified genes closest to these sites. This strategy

360 led us to identify the top-regulated loci including *PRE1* and *IAA19* (Fig. 4L), which  
361 were reported to mediate cell elongation processes, thus suggesting that BZR1-BAS  
362 complex may regulate a cell elongation gene expression axis, a well-known function of  
363 BR signaling pathway.

364

### 365 **Disruption of BAS complex activity blocks BR-mediated chromatin accessibility** 366 **enhancement**

367 To investigate the essentiality of BRM in BR-mediated regulation of chromatin  
368 accessibility, we analyzed the impact of the loss of BRM on DNA accessibility in BR-  
369 regulated chromatin accessibility regions. The chromatin accessibility levels at *bri1-*  
370 *701* decreased accessibility peaks were also significantly reduced in *brm-1* mutants (fig.  
371 S8, A and C). In contrast, no significant increase was observed in *brm-1* mutants at *bri1-*  
372 *701* increased accessibility peaks (fig. S8, B and C). Genome browser snapshots of  
373 ATAC-seq reads exemplified these results at the single-gene level (fig. S8D). Hence,  
374 these results imply that BRM may play a role in mediating BR-signaling-driven  
375 chromatin accessibility increase rather than decrease.

376 We next determined whether BR-mediated changes in chromatin accessibility  
377 requires BRM. We performed ATAC-seq using Col, *bzr1-ID*, *brm-1*, *bzr1-ID brm-1*  
378 seedlings grown on the medium containing 2  $\mu$ M PPZ for five days in the dark. *bzr1-*  
379 *ID* is a gain-of-function mutant BZR1 protein that harbors a proline at position 234 to  
380 leucine substitution (P234L) (50), which causes BZR1 stabilization and accumulation  
381 in the nucleus (9). We identified a cluster of 2,494 sites over which accessibility  
382 increased in *bzr1-ID*, along with another cluster of reduced sites (n = 844) (fig. S9, A  
383 and B and table S1). Most of these differential peaks were also located upstream or  
384 downstream of genes, consistent with those peaks in *bri1-701* mutants (fig. S9C).  
385 Notably, sites showing increased and reduced accessibility in *bzr1-ID* exhibited  
386 reduced and increased accessibility, respectively, in the *bri1-701* mutants (fig. S9, D to  
387 G).

388 Compared with *bzr1-ID* in WT background, *bzr1-ID* nearly lost the ability to  
389 enhance chromatin accessibility in *brm-1* background, because the upregulation of

390 accessibility by *bzr1-ID* was abolished to a Col level in the absence of BRM (Fig. 5, A  
391 and B). Heatmap analysis confirmed that disruption of BRM completely blocked the  
392 ability of *bzr1-ID* to increase chromatin accessibility (Fig. 5C). These results  
393 demonstrate that the ability of BR to increase chromatin accessibility is entirely  
394 dependent on BRM. On the contrary, when we analyzed *bzr1-ID*-reduced accessibility  
395 sites, we found that *bzr1-ID* in *brm-1* background still significantly reduced the  
396 chromatin accessibility at these sites, as it did in Col background (Fig. 5, D and E).  
397 Heatmap analysis again showed that the loss of BRM largely did not disturb the ability  
398 of *bzr1-ID* to decrease chromatin accessibility (Fig. 5F). These results support the  
399 notion that BRM activity is largely not required for the ability of BR to decrease  
400 chromatin accessibility. PCA analysis showed that *bzr1-ID brm-1* grouped with Col at  
401 BZR1 increased chromatin accessibility sites, while, at BZR1 decreased chromatin  
402 accessibility sites, *bzr1-ID brm-1* was more associated with *bzr1-ID* (Fig. 5, G and H).  
403 At the single-gene level, genome browser snapshots of ATAC-seq reads confirmed that  
404 BRM is required for BZR1 to increase chromatin accessibility at *PRE1* and *IAA19*  
405 genes but not to decrease chromatin accessibility (Fig. 5I). Taken together, these data  
406 demonstrate that BRM is essential for increasing rather than decreasing chromatin  
407 accessibility of genes regulated by the BR signaling pathway.

408

#### 409 **BRM deficiency blocks the elongation of hypocotyl and downregulates the** 410 **expression of cell elongation-related genes**

411 We next sought to define the biological function underpinning the essentiality of the  
412 BZR1-BAS complexes in BR-mediated chromatin accessibility. Similar to the *bri1-701*  
413 mutants, the *brm-1* mutants displayed a strongly reduced hypocotyl length under dark  
414 conditions (fig. S10A). Inactivation of the BAS-specific subunits (*brip1 brip2* double  
415 or *brd1 brd2 brd13* triple mutants) also impaired hypocotyl elongation under dark  
416 conditions (fig. S10B). These results implied that BAS complexes may be required for  
417 the BR-mediated hypocotyl elongation. Indeed, the *brm-1* mutants were more sensitive  
418 to PPZ treatment (Fig. 6A), suggesting that loss of BRM compromises BR responses.

419 We further generated *bri1-5 brm-1* double mutants to investigate the genetic

420 relationship between BZR1 and BRM. Comparison of hypocotyl length of the double  
421 mutant *bri1-5 brm-1* with that of the *bri1-5* and *brm-1* single mutants showed that loss  
422 of the BR receptor BRI did not exacerbate the shortened hypocotyl phenotype of the  
423 *brm-1* mutants (Fig. 6B), suggesting a role for the BAS complexes operated through  
424 the BR-signaling pathway to regulate hypocotyl elongation in the dark. In support of  
425 this notion, the *bzr1-ID brm-1* double mutants had hypocotyl length similar to *brm-1*  
426 grown on the medium with or without PPZ or BRZ (51) (a specific BR biosynthesis  
427 inhibitor—brassinazole) (Fig. 6C), demonstrating that the BZR1-BAS interaction is  
428 part of the BR-signaling pathway in regulating hypocotyl elongation in the dark.

429 We carried out reverse transcription followed by quantitative PCR (RT-qPCR) of  
430 several cell-elongation-associated genes in Col, *bzr1-ID*, *brm-1*, *bzr1-ID brm-1*  
431 mutants to explore the role of BRM in regulating the expression of cell-elongation  
432 associated genes. As shown in Fig. 6D, disruption of BRM severely compromised the  
433 *bzr1-ID*-induced upregulation of cell-elongation-associated genes, including *SAUR50*,  
434 *IAA19*, and *PRE1*. Taken together, these data indicate that the loss of BRM blocks the  
435 BZR1-promotion of hypocotyl elongation and downregulates the expression of genes  
436 involved in cell elongation.

437

#### 438 **BRM is required for the expression of BR-activated, but not BR-repressed, genes**

439 To further clarify the genome-wide role of the BZR1-BAS complexes in BR-regulated  
440 transcriptional activation or repression processes, we conducted RNA-sequencing  
441 (RNA-seq) assay using Col, *bzr1-ID*, *brm-1*, *bzr1-ID brm-1* seedlings grown on the  
442 medium containing 2  $\mu$ M PPZ in the dark for five days. We identified 929 upregulated  
443 and 1,096 downregulated genes ( $|\log_2$  fold change $| \geq 1$ ) affected more than twofold by  
444 *bzr1-ID* mutation when compared with Col (Fig. 7A and table S3). Profiling the  
445 dependence of the genes upregulated by *bzr1-ID* on BRM allowed us to define three  
446 clusters of genes including: those activated by BZR1 and repressed by BRM for  
447 expression (cluster 1, 19%); those moderately dependent on BRM for BZR1-mediated  
448 activation (cluster 2, 31%); and those entirely depends on BRM for BZR1-mediated  
449 activation (cluster 3, 50%) (Fig. 7B). Therefore, most of BZR1-upregulated genes

450 (81%, 753 out of 929) no longer or less upregulated in the *brm-1* background (Fig. 7, B  
451 and D), suggesting the critical role for BRM in mediating the transcriptional activation  
452 of BZR1. However, when we analyzed the genes repressed by *bzr1-ID* in the Col  
453 background, we found the majority of them (855 out of 1096, 78%) were still down-  
454 regulated in the *brm-1* background (Fig. 7, C and D), suggesting that BZR1-mediated  
455 transcriptional repression is largely independent of BRM.

456 GO analysis of the 753 BRM-dependent BZR1-upregulated genes revealed  
457 significant enrichment controlling a broad spectrum of developmental programmers  
458 including shade avoidance, root development, leaf senescence, response to light  
459 intensity, cell wall organization, epidermis development and response to Auxin, all of  
460 which are well-known BR-regulated pathways (Fig. 7E). In particular, Upregulation of  
461 genes involved in shade avoidance, light response, and cell wall organization in *bzr1-*  
462 *ID* was diminished in the *bzr1-ID brm-1* mutants. The aberrant upregulation of genes  
463 related to root development in *bzr1-ID* was abolished by the disruption of BRM. We  
464 also observed the activated expression of leaf senescence and plant epidermal  
465 development-related genes by BZR1 depends on BRM. Important genes governing  
466 auxin responses, including *IAA19*, *SAUR50*, and *PRE1*, were unable to be activated by  
467 BZR1 upon the loss of BRM.

468 Furthermore, integration of ATAC-seq and RNA-seq datasets identified a  
469 subcluster of genes ( $n = 157$ ) that showed up-regulated transcription and DNA  
470 accessibility in *bzr1-ID* mutants (Fig. 7F). The increase in RNA expression and  
471 accessibility by *bzr1-ID* was largely dependent on BRM (Fig. 7F). GO term analysis  
472 of these genes also revealed terms related to growth and development processes, such  
473 as radial pattern formation, response to Auxin and BR, cell wall organization, epidermis  
474 development and so on (Fig. 7G). Together, these data demonstrate that BZR1-BAS  
475 complexes have a vital role in gating BR-responsive genome accessibility and  
476 transcriptional activation in diverse post-embryonic developmental programs  
477 throughout plant life.

478

479



## 480 **Discussion**

481 As a master transcription factor in the BR signaling pathway, BZR1 regulates the  
482 expression of thousands of genes involved in diverse developmental and stress response  
483 programs. However, in contrast to the well-characterized BR signaling pathway  
484 upstream of BZR1, the downstream mechanisms by which BZR1 regulates gene  
485 expression are less understood. In this study, we report a direct molecular connection  
486 between BR-BZR1 signaling and SWI/SNF regulation (Fig. 8). BR signaling can  
487 modulate the chromatin accessibility and the consequential activation or repression of  
488 transcription of thousands of genes regulated by BZR1 (Fig. 1 and fig. S1).  
489 Mechanistically, we show that nucleus-localized BZR1 physically interacts with BRM  
490 and several BAS-specific subunits (Fig. 2 and fig. S2), has a high colocalization with  
491 BRM on the genome (Fig. 3 and fig. S3), and enhances BRM occupancy at BR-  
492 increased accessibility sites (Fig. 4 and fig. S6). BRM governs the BR-mediated  
493 chromatin accessibility increase, rather than decrease (Fig. 5). Finally, phenotypic and  
494 transcriptome analysis provided compelling evidence for the indispensability of BRM  
495 in BR-mediated hypocotyl elongation (Fig. 6) and genome-wide transcriptional  
496 activation (Fig. 7). We propose that BAS-SWI/SNF chromatin remodeling acts to  
497 dictate the transcriptional activation activity of BZR1 for BR-regulated growth and  
498 development in plants. This signaling axis thus serves as a phytohormone-mediated  
499 checkpoint for regulating BAS-SWI/SNF activity essential for key developmental  
500 phases and processes throughout plant growth and development (Fig. 8A).

501 Plants are constantly exposed to various stress signals in facing their environment,  
502 and thus, they must balance their growth and defense mechanisms to optimize fitness  
503 (52). Understanding the balance mechanism of growth and defense is important for  
504 developing strategies to maximize crop yield (53, 54). BR has been identified as a  
505 critical hormone in plant growth-defense coordination; however, the underlying  
506 mechanisms remain poorly understood (10, 55-57). Our genome-wide analyses define  
507 a broad spectrum of development-related pathways as targets of the BZR1-SWI/SNF  
508 signaling network (fig. S1J and Fig.7E). This BR-stimulated epigenomic activation  
509 network induces transcription of genes required for promoting growth-related programs,

510 including shade avoidance, root development, cell wall organization, epidermis  
511 development, and response to light intensity and Auxin (Fig. 7E). By contrast, pathways  
512 associated with responses to hypoxia, salicylic acid, salt stress, and oxidative stress are  
513 the major targets of BR-mediated chromatin repression (fig. S1K). This dual molecular  
514 role of BR in balancing chromatin accessibility states between growth- and stress-  
515 related genes ensures that the proliferation and differentiation processes during plant  
516 growth in time and space are coordinated and balanced with stress conditions (Fig. 8,  
517 A and B).

518 Notably, recent studies reported that hormones other than BR are also associated  
519 with chromatin accessibility regulation in plants. Cytokinins (CK) regulate the  
520 development of specific plant tissues by modulating chromatin accessibility (58). Auxin  
521 plays a pivotal role in triggering dynamic changes in chromatin accessibility during  
522 embryonic development (59). However, the precise molecular mechanisms governing  
523 these hormone-induced alterations in chromatin accessibility remain enigmatic. Given  
524 the reported functional connection between CK or Auxin and BRM remodelers (60, 61),  
525 it is tempting to speculate that a parallel mechanism involving SWI/SNF-mediated  
526 chromatin remodeling activity may be responsible for these phytohormones to govern  
527 epigenetic landscapes and gene regulatory dynamics in plants.

528 What determines the transcriptional activation versus repressive activity of BZR1  
529 is a long-standing question. Previous *in vitro* DAP-seq analysis suggested that the  
530 motifs recognized by BZR1 might determine its transcriptional activity, with BZR1  
531 preferentially recognizes the 10 bp DNA fragment containing the known G-box core-  
532 binding motif at the center for transcriptional repression activity; however, the  
533 mechanism of BZR1-induced transcriptional activation is unknown (29). Here, we  
534 found through integrating ChIP-seq and ATAC-seq data that BZR1 significantly  
535 enriches in both BR-decreased and increased DARs (Fig. 1I). Further analysis revealed  
536 that a same 10 bp DNA sequence, containing a G-box core motif, was significantly  
537 enriched in both the increased and decreased DARs (Fig. 1, F and G), implying that *cis*-  
538 motif may not be the major determinant of the transcriptional activation or repression  
539 activity of BZR1. Therefore, other factors are assumed to be responsible for

540 distinguishing the mutual transition between transcriptional activation and repression  
541 of BZR1. Here, we found that BRM mediates the transcriptional activation ability of  
542 BZR1 through increasing chromatin accessibility but does not involve in the  
543 transcriptional repression of BZR1, indicating that BRM as a transcriptional co-  
544 regulator that specifically confers the transcriptional activation activity of BZR1.  
545 Interestingly, previous studies have shown that TPL, acting as a co-repressor, interacts  
546 with the EAR domain of BZR1 to determine its transcriptional repression activity (30).  
547 Therefore, we propose that trans-regulators rather than cis-elements determine BZR1's  
548 transcriptional activation and repression activity.

549 Interestingly, the EAR domain of BZR1 is required not only for transcriptional  
550 repression but also for transcriptional activation (30, 62). However, the mechanistic  
551 action of EAR in BZR1 transcriptional activation is unknown. Surprisingly, although  
552 our results showed that BRM ATPase of the BAS complex interacts with the N-terminal  
553 region of BZR1, the core subunits BRIP1, BRD13, and SWP73A of the BAS interact  
554 with the EAR domain-containing C-terminal region of BZR1 (Fig. 2G). Moreover, BAS  
555 interacts with the EAR domain of BZR1 through the SWP73A core subunit (fig. S2H).  
556 Thus, given that both the BAS subunits and TPL can interact with the EAR domain, we  
557 propose that when BZR1-BAS activates genes, the interaction between BAS and BZR1  
558 on the promoter of BR-activated genes may trigger a conformational change that  
559 prevents the EAR domain from being approached by the TPL co-repressor. This  
560 transition of transcriptional co-regulators, from TPL to BRM, may determine the  
561 transcriptional activation capacity of the EAR domain. Given the ubiquity of the EAR  
562 motif in multiple transcription factors with a dual function in activation and repression,  
563 it will be interesting to examine whether BAS may be responsible for transmitting the  
564 transcriptional repression function to the activation ability of diverse transcription  
565 factors.

566 Our data show that, in addition to its role in inducing chromatin accessibility,  
567 BZR1 is also able to repress DNA accessibility (Fig. 5, D and F). Loss of BRM largely  
568 does not disturb the function of BZR1 in decreasing the chromatin accessibility (Fig. 5,  
569 D and F), implying that the BZR1-mediated decrease in chromatin accessibility likely

570 requires other chromatin regulators. Apart from BAS, Arabidopsis has two other  
571 subcomplexes of the SWI/SNF complexes, SAS and MAS. However, like BAS, the  
572 SAS and MAS are primarily involved in enhancing chromatin accessibility (41),  
573 therefore, are unlikely to be responsible for the BR-mediated DNA accessibility  
574 downregulation. Other candidates could be imitation switch (ISWI), chromodomain  
575 helicase DNA-binding (CHD), and inositol requiring 80 (INO80) remodeling  
576 complexes, although whether they can regulate chromatin accessibility in the genome  
577 remains unclear. In addition, previous studies have demonstrated that TPL and HDA19  
578 are responsible for BR-mediated transcriptional repression. Thus, the possibility that  
579 BZR1 may rely on the TPL-HDA19 module to confer a closed chromatin landscape  
580 requires further evaluation.

581 In summary, our work uncovers the mechanistic basis for the transcriptional  
582 activation activity of the BR signaling pathway. This molecular mechanism provides a  
583 long-sought mechanistic explanation for how BR signaling activates multiple  
584 developmental processes including hypocotyl elongation in plants. Our study advances  
585 a conceptual understanding of how multicellular organisms convert systemic hormonal  
586 information to remodel the global chromatin accessibility landscapes by modulating  
587 local chromatin regulators, thus orchestrating transcriptional states that are central for  
588 diverse developmental programs.

589

## 590 **Materials and Methods**

### 591 **Plant materials and growth conditions**

592 The mutants *brm-1* (SALK\_030046), *brip1 brip2* (SALK\_133464 and SALK\_177513),  
593 *brd1 brd2 brd13* (SALK\_1012963, SALK\_025965 and SALK\_053556), and  
594 *pBRM:BRM-GFP brm-1* transgenic plants were previously described (47, 48, 63). The  
595 *pBZR1:BZR1-YFP* transgenic plants were previously described (15). The *bri1-5* (64)  
596 mutants were kindly provided by Prof. Hongwei Xue. The *bzr1-1D* (50) mutants were  
597 kindly provided by Prof. Junxian He. The *bri1-701* mutants were kindly provided by  
598 Prof. Jia Li. All plants were in the Columbia-0 (Col-0) background except for *bri1-5*,

599 which is in the Wassilewskija (Ws) ecotypes.

600 Arabidopsis plants were grown in a greenhouse with a 16-h light/8-h dark cycle at  
601 22 °C for general growth and seed harvesting. For RT-qPCR/RNA-seq, ChIP-  
602 qPCR/ChIP-seq, ATAC-seq, and IP-MS assays, seeds were subjected to a sterilization  
603 process using a 15% sodium hypochlorite solution, followed by three washes with  
604 sterile water. Subsequently, the sterilized seeds were stratified in darkness at 4 °C for a  
605 duration of three days. The stratified seeds were then sown onto ½-strength Murashige  
606 and Skoog (MS) medium supplemented with 1% sucrose and 0.6% agar.

607

### 608 **Generation of transgenic plants**

609 For *BZR1-3xFLAG BRM-GFP brm-1*, genomic regions corresponding to full-length  
610 BZR1, including a 2.0-kb promoter and the coding region without the stop codon, were  
611 amplified and subcloned into *pZPY122-FLAG (65)* (after cutting with restriction  
612 enzymes KpnI and PstI) using a homologous recombination with the ClonExpress  
613 Entry One Step Cloning Kit (Vazyme, Cat. No. C114). The construct was introduced  
614 into *A. tumefaciens* strain *GV3101*, which was used to transform *pBRM:BRM-GFP*  
615 *brm-1* transgenic plants using the floral dip method. Primers used for constructing are  
616 listed in table S4.

617

### 618 **Hypocotyl length measurements**

619 Seeds were subjected to sterilization using a 15% sodium hypochlorite solution,  
620 followed by cultivation on half-strength MS medium supplemented with 0.8% agar.  
621 After a cold stratification period of three days at 4 °C, the seedlings were exposed to  
622 white light for 6 h to induce germination. Subsequently, the seedlings were incubated  
623 under dark condition for five days. Photocopies of the seedlings were obtained, and the  
624 lengths of the hypocotyls were measured using ImageJ software  
625 (<http://rsb.info.nih.gov/ij>).

626

### 627 **Y2H assays**

628 The BAS-associated Y2H vectors employed in this study have been previously

629 described (47, 48). To generate full-length and truncated versions of BZR1, the  
630 corresponding truncated fragments were amplified from Col cDNA and subsequently  
631 cloned into the BamHI sites of *pGADT7* or *pGBKT7* plasmids using the ClonExpress  
632 II One Step Cloning Kit (Vazyme, Cat. No. C112-01). The resulting constructs were co-  
633 transformed into the Y2H Gold yeast strain (*AHI09*), and all yeast cells were cultured  
634 on selective media, such as SD medium lacking leucine and tryptophan or SD medium  
635 lacking adenine, histidine, leucine, and tryptophan. Primers used for constructing are  
636 listed in table S4.

637

### 638 **BiFC assays**

639 The full-length coding sequences of BZR1 were amplified from cDNA derived from  
640 *Arabidopsis thaliana* Col-0 and subsequently inserted into the *pEarleyGate 201-nYFP*  
641 vector (66) using the LR reaction (Invitrogen). The BAS-associated BiFC vectors  
642 employed in this study have been previously described (47, 48). The resulting  
643 constructs were individually introduced into *Agrobacterium tumefaciens* strain *GV3101*,  
644 and the transformed bacteria were then used for infiltration into the lower epidermal  
645 cells of *Nicotiana benthamiana* leaves (67). After a 48-hour incubation period, YFP  
646 fluorescence signals were visualized using a confocal microscope (LSM880 with Fast  
647 Airy scan). As a negative control, HAT3 (encoded by *AT3G60390*) was included.  
648 Primers used for constructing are listed in table S4.

649

### 650 **Co-immunoprecipitation**

651 The full-length coding sequences of BZR1 and SWP73A were amplified from cDNA  
652 obtained from *Arabidopsis thaliana* Col-0 and subsequently inserted into the BamHI  
653 sites of the *pHB-HA* or *pHB-FLAG* vector (68). The vectors *pEAQ-BRM-N-GFP*, *pHB-*  
654 *BRIP1-HA*, *pHB-BRIP2-HA*, *pHB-BRD2-HA*, and *pHB-BRD13-HA* have been  
655 previously described (47, 48). Primers used for constructing are listed in table S4.

656 For Co-IP, the constructs were co-transformed into tobacco leaves, which were  
657 collected after 48 h. Total proteins were isolated from 0.2 g tobacco leaves and then  
658 lysed with 2 ml of IP buffer (50 mM HEPES (pH 7.5) 150 mM NaCl, 10 mM EDTA,

659 1% Triton X-100, 10% glycerol, 0.2% NP- 40, and 1× Complete protease inhibitor  
660 cocktail (Roche)) at 4°C for 30 min. After centrifugation at 5000 g and 4°C for 10 min,  
661 the supernatant was incubated with 10 µl of anti-HA-agarose antibody (Sigma, Cat. No.  
662 A2095-1ML) or anti-FLAG beads (Bimake, Cat. No. B26101-1ML) at 4°C for 3 h and  
663 then washed three times with washing buffer (50 mM HEPES (pH 7.5) 100 mM NaCl,  
664 10 mM EDTA, 10% glycerol, 0.1% NP-40, and 1× Complete protease inhibitor cocktail  
665 (Roche)). Finally, proteins were diluted in 5× SDS loading buffer and boiled at 55°C  
666 for 10 min, followed by immunoblotting.

667 For co-IP analysis of stable Arabidopsis transgenic plants, 2 g of 14-day-old  
668 seedlings grown under long-day conditions were carefully ground to a fine powder in  
669 liquid nitrogen. The resulting powder was resuspended in 30 ml of extraction buffer 1  
670 (comprising 0.4 M sucrose, 10 mM Tris-HCl (pH 8.0), 10 mM MgCl<sub>2</sub>, 5 mM β-ME,  
671 0.1 mM PMSF, and 1× Complete protease inhibitor cocktail (Roche)). The homogenate  
672 was then passed through two layers of Miracloth to remove solid debris, followed by  
673 centrifugation at 3,000 g for 20 min at 4°C. The resulting precipitates were subsequently  
674 lysed in 10 ml of IP buffer (containing 100 mM Tris-HCl (pH 7.5), 300 mM NaCl,  
675 2 mM EDTA, 1% Triton X-100, 10% glycerol, 1 mM PMSF, and 1× Complete protease  
676 inhibitor cocktail (Roche)) at 4°C for 30 min. After centrifugation at 14,000 g for 15  
677 min at 4°C, the supernatant was diluted with an equal volume of dilution buffer  
678 (comprising 100 mM Tris-HCl (pH 7.5), 2 mM EDTA, 10% glycerol, 1 mM PMSF, and  
679 1× Complete protease inhibitor cocktail (Roche)). Subsequently, the diluted supernatant  
680 was incubated with anti-FLAG beads (Bimake, Cat. No. B26101-1ML) at 4°C for 3 h  
681 with gentle rotation. The beads were then washed three times with 1×PBS solution  
682 containing 0.1% Tween-20. Finally, the proteins were eluted in 5× SDS loading buffer  
683 and incubated at 55°C for 10 min, followed by subsequent immunoblotting.

684

### 685 **Mass spectrometry**

686 For mass spectrometry, the immunoprecipitated proteins using Co-IP methods were  
687 eluted using 0.2 M glycine solution (pH 2.5), and then subjected to reduction with  
688 dithiothreitol, alkylation with iodoacetamide and digested with trypsin (Thermo Fisher,

689 Cat. No. 90057, MS748 grade). The samples were analyzed on a Thermo Scientific Q  
690 Exactive HF mass spectrometer in data-dependent mode. Spectral data were searched  
691 against the TAIR10 database using Protein Prospector 4.0. Two biological replicates  
692 were included in the IP-MS analysis. Raw data were searched against the TAIR10.  
693 Default settings for Label-free quantitation (LFQ) analysis using MaxQuant65 and  
694 Perseus software were applied to calculate the LFQ intensities with default settings.

695

### 696 **Immunoblotting**

697 Protein samples were loaded onto 4%-20% gradient protein gels (GenScript, SurePAGE,  
698 Cat. No. M00655) or 10% SDS-PAGE gels and electrophoresed at 150 V for 2 h.  
699 Subsequently, a wet transfer was conducted in ice-cold transfer buffer at 90 V for 90  
700 min. Following transfer, the membranes were blocked with 5% non-fat milk at room  
701 temperature for 1.5 h on a shaking table. The blocked membranes were then incubated  
702 with specific antibody solutions at room temperature for an additional 3 h. The  
703 antibodies used included anti-GFP (Abcam, Cat. No. ab290, diluted 1:10,000), anti-HA  
704 (Sigma-Aldrich, Cat. No. H6533, diluted 1:5000), anti-FLAG (Sigma-Aldrich, Cat. No.  
705 A8592, diluted 1:5000), anti-H3 (Proteintech, Cat. No. 17168-1-AP, diluted 1:10,000),  
706 and horseradish peroxidase-conjugated goat-anti-rabbit secondary antibody (Abcam,  
707 Cat. No. ab6721, diluted 1:10,000). The intensity of the blotting signals was quantified  
708 using ImageJ software (version 1.50i).

709

### 710 **RNA isolation, qRT-PCR and RNA-seq analyses**

711 Total RNA was extracted from 5-day-old seedlings grown in the dark using the HiPure  
712 Plant RNA Mini Kit C (Cat. No. R4151-02C) following the manufacturer's protocol.  
713 Reverse transcription reactions were carried out using 1 µg of total RNA with HiScript  
714 II Q RT SuperMix for qPCR (+gDNA wiper) with gDNA eraser (Vazyme, Cat. No.  
715 R223-01). Quantitative real-time PCR (qRT-PCR) was performed using the SYBR  
716 Green SuperMix and StepOne Software v.2.3 (Applied Biosystems) with 40 cycles of  
717 amplification (including three biological replicates). The relative expression levels  
718 were analyzed using the  $-\Delta\Delta C_t$  (cycle threshold) method (69), and the data were



719 normalized to the expression of the reference gene *ACTIN2*. Primers used for  
720 constructing are listed in table S4.

721 For RNA-seq analyses, RNA libraries were generated using the TruSeq RNA  
722 sample preparation kit (Illumina) following the manufacturer's instructions, and the  
723 sequencing was performed at Novogene (Beijing, China) on the Illumina novaseq  
724 PE150 platform. For data analysis, the raw sequence reads were aligned to the TAIR10  
725 genome using TopHat (Galaxy v.2.1.1) (70), with a minimum intron length set to 20  
726 and a maximum intron length set to 4000. Subsequently, the mapped reads were  
727 assembled using Cufflinks (Galaxy v.2.2.1.3) (71) based on the TAIR10 genome  
728 annotation, utilizing default settings. To identify differentially expressed genes, the  
729 assembled transcripts from three independent biological replicates of Col and the  
730 mutants were combined and compared using Cuffmerge (Galaxy v.2.2.1.2) (71) with  
731 default parameters. Genes exhibiting at least a 2-fold change in expression (false  
732 discovery rate [FDR] <0.05,  $P < 0.05$ ) were considered differentially expressed and  
733 used for subsequent analysis. The heatmap and the clusters of BZR1-regulated genes  
734 sorted by k-means approach were performed using MeV software (72).

735

### 736 **ChIP experiment and ChIP-seq analysis**

737 ChIP experiments were conducted following previously established protocols with  
738 slight modifications (63, 73). In brief, with treatment with DMSO or 2  $\mu$ M PPZ for 4 h,  
739 5-day-old seedlings (approximately 1 g per biological replicate) cultivated on 1/2-  
740 strength MS medium under dark conditions were fixed using 1% formaldehyde under  
741 vacuum for 15 minutes, followed by grinding into fine powder in liquid nitrogen.  
742 Chromatin was sonicated to obtain fragments of approximately 300 base pairs using a  
743 Bioruptor sonicator, utilizing a 30/30-second on/off cycle (27 total on cycles) at the  
744 high setting. Immunoprecipitation was performed overnight at 4°C using 1  $\mu$ l of anti-  
745 GFP antibody (Abcam, Cat. No. ab290). ChIP-qPCR analysis was conducted with three  
746 biological replicates, and the results were quantified as a percentage of input DNA,  
747 following the guidelines provided in the Champion ChIP-qPCR user manual  
748 (SABioscience). Primers used for constructing are listed in table S4.

749 For ChIP-seq, approximately 2 g of seedlings was utilized, and the ChIPed DNA  
750 was purified using the MinElute PCR purification kit (Qiagen, Cat. No. 28004).  
751 Libraries were constructed using 1-2 ng of ChIPed DNA with the VAHTS Universal  
752 DNA Library Prep Kit for Illumina V3 (Vazyme Biotech, Cat. No. ND607), VAHTS  
753 DNA Adapters set3–set6 for Illumina (Vazyme Biotech, Cat. No. N805), and VAHTS  
754 DNA Clean Beads (Vazyme Biotech, Cat. No. N411-02), following the manufacturer's  
755 protocol. High-throughput sequencing was performed on the Illumina NovaSeq  
756 platform (sequencing method: NovaSeq-PE150). The ChIP-seq of BRIP1/2 and  
757 BRD1/2/13 using 14-day-old seedlings under long-day conditions has been described  
758 (47, 48).

759 ChIP-seq data analysis was conducted following established protocols (63).  
760 Briefly, the raw data underwent trimming using fastp software, with the parameters set  
761 as follows: "-g -q 5 -u 50 -n 15 -l 150". The resulting clean data was then aligned to the  
762 *A. thaliana* reference genome (TAIR10) using Bowtie 2 with default settings(74). Only  
763 reads that mapped perfectly and uniquely were retained for subsequent analysis. Peak  
764 calling was performed using MACS 2.074 with the following parameters: "gsize =  
765 119,667,750, bw = 300, q = 0.05, nomodel, extsize = 200." The aligned reads were  
766 converted to wiggle (wig) format, and bigwig files were generated using bamCoverage  
767 with the options "-bs 10" and "-normalizeUsing RPKM (reads per kilobase per million)"  
768 from the deepTools (75) software suite. The resulting data were imported into the  
769 Integrative Genomics Viewer (IGV) for visualization. Only peaks that were identified  
770 in both biological replicates, meeting the threshold of irreproducible discovery rate  $\geq$   
771 0.05, were considered for further analysis. To annotate the peaks to genes, CHIPseeker  
772 (76) was employed with default settings, with the requirement of 2 kb upstream and  
773 downstream of the transcription start site (TSS). ComputeMatrix and plotProfile (75)  
774 tools were utilized to compare the mean occupancy density of BRM and BZR1 at  
775 specific loci, with detailed information provided in the respective figure legends.

776 To assess read density and evaluate the correlation between different ChIP-seq  
777 samples, we conducted Person correlation analysis. The read density was examined  
778 across the combined set of binding sites from all ChIP experiments using the

779 multiBigwig-Summary function available in deepTools (75), employing a bin size of  
780 1,000. The Pearson correlation heatmap was generated using the PlotCorrelation  
781 function within deepTools (75). To investigate peak overlaps, we employed the  
782 Bedtools intersect function, which enabled the identification of common regions  
783 between different sets of peaks.

784

#### 785 **ATAC-seq assay and data analyses**

786 To isolate protoplasts from 5-day-old Arabidopsis seedlings grown under dark  
787 conditions with indicated treatment, approximately 0.5 g of plant tissue was collected  
788 and cut into small pieces. Subsequently, the chopped tissue was treated with 5 ml of  
789 Enzyme solution, composed of 20 mM MES (pH 5.7), 1.5% cellulase R10, 0.4%  
790 macerozyme R10, 0.4 M mannitol, 10 mM CaCl<sub>2</sub>, 3 mM β-mercaptoethanol, and 0.1%  
791 BSA, following a previously described method (77). Protoplasts were then counted  
792 using a hemacytometer under a microscope, and approximately 40,000 protoplasts were  
793 used for the isolation of nuclei. The nuclei were obtained by treating the protoplasts  
794 with 5 ml of lysis buffer, consisting of 1× PBS (pH 7.5), 0.5% Triton X-100, and 1×  
795 Complete Protease Inhibitor Cocktail (Roche). After isolation, the crude nuclei were  
796 subjected to three washes with Nuclei Extraction Buffer (1× PBS (pH 7.5), 0.25 M  
797 Sucrose, 1 mM PMSE, 1 mM β-mercaptoethanol, 0.5% Triton X-100, 1× Complete  
798 Protease Inhibitor Cocktail (Roche)), followed by a single wash with Tris-Mg buffer  
799 (10 mM Tris-HCl (pH 8.0), 5 mM MgCl<sub>2</sub>). The purified nuclei were then incubated  
800 with Tn5 transposome and tagmentation buffer at 37 °C for 30 min (Vazyme Biotech,  
801 Cat. No. TD501). Following tagmentation, DNA was purified using the MinElute PCR  
802 purification kit (Qiagen, Cat. No. 28004) and subsequently amplified for 9 cycles using  
803 the TruePrep™ DNA Library Prep Kit V2 for Illumina® (Vazyme Biotech, Cat. No.  
804 TD501). The number of PCR cycles was determined according to previously published  
805 methods (59). Index primers from the TruePrep™ Index Kit V2 for Illumina®  
806 (Vazyme Biotech, Cat. No. TD202) were used for library amplification. Amplified  
807 libraries were then purified using VAHTS DNA Clean Beads (Vazyme Biotech, Cat.  
808 No. N411-02). Two biological replicates were performed for each sample. High-

809 throughput sequencing was carried out on the Illumina NovaSeq platform using the  
810 NovaSeq-PE150 sequencing method. The ATAC-seq of Col and *brm-1* in  
811 Supplementary Fig. 8 using 14-day-old seedlings under short-day conditions.

812 ATAC-seq data analyses were conducted following previously published methods  
813 with some modifications (59). Briefly, the raw data underwent trimming using fastp,  
814 with the adapter sequence set as "CTGTCTCTTATACACATCT". The resulting clean  
815 data was then mapped to the *A. thaliana* reference genome (TAIR10) using Bowtie 2  
816 with default settings. To eliminate unmapped and organelle reads, the online tool "Filter  
817 BAM datasets" was employed with the parameter "mapping quality  $\geq 30$ , !Mt, !Pt".  
818 Duplicated reads were removed using the online tool "MarkDuplicates" with default  
819 settings. Peak calling, peak annotation, bamCoverage, and visualization in IGV  
820 followed the methods employed for ChIP-seq data analyses. Differential DNA  
821 accessibility between mutant and wild-type samples was determined using DiffBind  
822 (78) with default settings. ComputeMatrix and plotProfile (75) were utilized to compare  
823 the mean DNA accessibility density of mutants and wild-type at defined genomic loci,  
824 with detailed information provided in the corresponding figure legends.

825

### 826 **Gene ontology analysis**

827 GO analysis for enriched biological processes was performed with the online tools  
828 (<https://metascape.org/>) with default settings, and plotted at online tools  
829 (<http://www.bioinformatics.com.cn/>)

830

### 831 **Accession numbers**

832 Accession numbers of genes reported in this study include: *AT1G75080* (BZR1),  
833 *AT2G46020* (BRM), *AT1G21700* (SWI3C), *AT3G01890* (SWP73A), *AT3G03460*  
834 (BRIP1), *AT5G17510* (BRIP2), *AT1G20670* (BRD1), *AT1G76380* (BRD2),  
835 *AT5G55040* (BRD13), *AT3G23250* (MYB15), *AT5G52050* (DTX50), *AT5G39860*  
836 (PRE1), *AT3G15540* (IAA19), *AT4G34760* (SAUR50)

837

### 838 **References**

- 839 1. J. K. Zhu, Abiotic stress signaling and responses in plants. *Cell*. **167**, 313-324 (2016).
- 840 2. T. W. Kim, Z. Y. Wang, Brassinosteroid signal transduction from receptor kinases to  
841 transcription factors. *Annu Rev Plant Biol*. **61**, 681-704 (2010).
- 842 3. Z. Y. Wang, M. Y. Bai, E. Oh, J. Y. Zhu, Brassinosteroid signaling network and regulation of  
843 photomorphogenesis. *Annu Rev Genet*. **46**, 701-724 (2012).
- 844 4. Z. Y. Wang *et al.*, BRI1 is a critical component of a plasma-membrane receptor for plant  
845 steroids. *Nature*. **410**, 380-383 (2001).
- 846 5. Y. Sun *et al.*, Structure reveals that BAK1 as a co-receptor recognizes the BRI1-bound  
847 brassinolide. *Cell Res*. **23**, 1326-1329 (2013).
- 848 6. W. Tang *et al.*, BSKs mediate signal transduction from the receptor kinase BRI1 in  
849 Arabidopsis. *Science*. **321**, 557-560 (2008).
- 850 7. T. W. Kim, S. Guan, A. L. Burlingame, Z. Y. Wang, The CDG1 kinase mediates  
851 brassinosteroid signal transduction from BRI1 receptor kinase to BSU1 phosphatase and  
852 GSK3-like kinase BIN2. *Mol Cell*. **43**, 561-571 (2011).
- 853 8. T. W. Kim *et al.*, Brassinosteroid signal transduction from cell-surface receptor kinases to  
854 nuclear transcription factors. *Nat Cell Biol*. **11**, 1254-1260 (2009).
- 855 9. W. Tang *et al.*, PP2A activates brassinosteroid-responsive gene expression and plant  
856 growth by dephosphorylating BZR1. *Nat Cell Biol*. **13**, 124-131 (2011).
- 857 10. T. M. Nolan *et al.*, Brassinosteroids: multidimensional regulators of plant growth,  
858 development, and stress responses. *Plant Cell*. **32**, 295-318 (2020).
- 859 11. E. Oh, J. Y. Zhu, Z. Y. Wang, Interaction between BZR1 and PIF4 integrates brassinosteroid  
860 and environmental responses. *Nat Cell Biol*. **14**, 802-809 (2012).
- 861 12. M. Y. Bai *et al.*, Brassinosteroid, gibberellin and phytochrome impinge on a common  
862 transcription module in Arabidopsis. *Nat Cell Biol*. **14**, 810-817 (2012).
- 863 13. E. Oh *et al.*, Cell elongation is regulated through a central circuit of interacting  
864 transcription factors in the Arabidopsis hypocotyl. *Elife*. **3**, e03031 (2014).
- 865 14. Z. Zhang *et al.*, TOR signaling promotes accumulation of BZR1 to balance growth with  
866 carbon availability in Arabidopsis. *Curr Biol*. **26**, 1854-1860 (2016).
- 867 15. J. Chaiwanon, Z. Y. Wang, Spatiotemporal brassinosteroid signaling and antagonism with  
868 auxin pattern stem cell dynamics in Arabidopsis roots. *Curr Biol*. **25**, 1031-1042 (2015).
- 869 16. T. M. Nolan *et al.*, Brassinosteroid gene regulatory networks at cellular resolution in the  
870 Arabidopsis root. *Science*. **379**, eadf4721 (2023).
- 871 17. Z. Wei, J. Li, Brassinosteroids regulate root growth, development, and symbiosis. *Mol Plant*.  
872 **9**, 86-100 (2016).
- 873 18. W. B. Jiang, W. H. Lin, Brassinosteroid functions in Arabidopsis seed development. *Plant*  
874 *Signal Behav*. **8**, e25928 (2013).
- 875 19. Q. Ye *et al.*, Brassinosteroids control male fertility by regulating the expression of key  
876 genes involved in Arabidopsis anther and pollen development. *Proc Natl Acad Sci U S A*.  
877 **107**, 6100-6105 (2010).
- 878 20. J. M. Gendron *et al.*, Brassinosteroids regulate organ boundary formation in the shoot  
879 apical meristem of Arabidopsis. *Proc Natl Acad Sci U S A*. **109**, 21152-21157 (2012).
- 880 21. M. Fan *et al.*, The bHLH transcription factor HBI1 mediates the trade-off between growth  
881 and pathogen-associated molecular pattern-triggered immunity in Arabidopsis. *Plant*  
882 *Cell*. **26**, 828-841 (2014).

- 883 22. F. G. Malinovsky *et al.*, Antagonistic regulation of growth and immunity by the Arabidopsis  
884 basic helix-loop-helix transcription factor homolog of brassinosteroid enhanced  
885 expression2 interacting with increased leaf inclination1 binding bHLH1. *Plant Physiol.* **164**,  
886 1443-1455 (2014).
- 887 23. T. Jimenez-Gongora, S. K. Kim, R. Lozano-Duran, C. Zipfel, Flg22-triggered immunity  
888 negatively regulates key BR biosynthetic genes. *Front Plant Sci.* **6**, 981 (2015).
- 889 24. S. Kang *et al.*, The Arabidopsis transcription factor BRASSINOSTEROID INSENSITIVE1-  
890 ETHYL METHANESULFONATE-SUPPRESSOR1 is a direct substrate of MITOGEN-  
891 ACTIVATED PROTEIN KINASE6 and regulates immunity. *Plant Physiol.* **167**, 1076-1086  
892 (2015).
- 893 25. V. E. Ramirez, B. Poppenberger, Modes of brassinosteroid activity in cold stress tolerance.  
894 *Front Plant Sci.* **11**, 583666 (2020).
- 895 26. J. Chen *et al.*, Arabidopsis WRKY46, WRKY54, and WRKY70 transcription factors are  
896 involved in brassinosteroid-regulated plant growth and drought responses. *Plant Cell.* **29**,  
897 1425-1439 (2017).
- 898 27. Y. Sun *et al.*, Integration of brassinosteroid signal transduction with the transcription  
899 network for plant growth regulation in Arabidopsis. *Dev Cell.* **19**, 765-777 (2010).
- 900 28. X. Yu *et al.*, A brassinosteroid transcriptional network revealed by genome-wide  
901 identification of BES1 target genes in Arabidopsis thaliana. *Plant J.* **65**, 634-646 (2011).
- 902 29. S. Nosaki *et al.*, Brassinosteroid-induced gene repression requires specific and tight  
903 promoter binding of BIL1/BZR1 via DNA shape readout. *Nat Plants.* **8**, 1440-1452 (2022).
- 904 30. E. Oh *et al.*, TOPLESS mediates brassinosteroid-induced transcriptional repression  
905 through interaction with BZR1. *Nat Commun.* **5**, 4140 (2014).
- 906 31. D. Zhang, Y. Jing, Z. Jiang, R. Lin, The chromatin-remodeling factor PICKLE integrates  
907 brassinosteroid and gibberellin signaling during skotomorphogenic growth in Arabidopsis.  
908 *Plant Cell.* **26**, 2472-2485 (2014).
- 909 32. Z. Li *et al.*, Brassinosteroid signaling recruits histone 3 lysine-27 demethylation activity to  
910 FLOWERING LOCUS C chromatin to inhibit the floral transition in Arabidopsis. *Mol Plant.*  
911 **11**, 1135-1146 (2018).
- 912 33. Z. Yang *et al.*, BIC1 acts as a transcriptional coactivator to promote brassinosteroid  
913 signaling and plant growth. *EMBO J.* **40**, e104615 (2021).
- 914 34. C. M. Uyehara *et al.*, Hormone-dependent control of developmental timing through  
915 regulation of chromatin accessibility. *Genes Dev.* **31**, 862-875 (2017).
- 916 35. B. R. Cairns, The logic of chromatin architecture and remodelling at promoters. *Nature.*  
917 **461**, 193-198 (2009).
- 918 36. G. J. Narlikar, R. Sundaramoorthy, T. Owen-Hughes, Mechanisms and functions of ATP-  
919 dependent chromatin-remodeling enzymes. *Cell.* **154**, 490-503 (2013).
- 920 37. C. R. Clapier, B. R. Cairns, The biology of chromatin remodeling complexes. *Annu Rev*  
921 *Biochem.* **78**, 273-304 (2009).
- 922 38. A. Jerzmanowski, SWI/SNF chromatin remodeling and linker histones in plants. *Biochim*  
923 *Biophys Acta.* **1769**, 330-345 (2007).
- 924 39. S. Schick *et al.*, Acute BAF perturbation causes immediate changes in chromatin  
925 accessibility. *Nat Genet.* **53**, 269-278 (2021).
- 926 40. D. C. Hargreaves, Chromatin openness requires continuous SWI/SNF activity. *Nat genetics.*

- 927           **53**, 263-264 (2021).
- 928   41.   J. Guo *et al.*, Comprehensive characterization of three classes of Arabidopsis SWI/SNF  
929           chromatin remodelling complexes. *Nat Plants*. **8**, 1423-1439 (2022).
- 930   42.   W. Fu *et al.*, Organization, genomic targeting, and assembly of three distinct SWI/SNF  
931           chromatin remodeling complexes in Arabidopsis. *Plant Cell*. Online ahead of print (2023).
- 932   43.   T. L. Bailey, P. Machanick, Inferring direct DNA binding from ChIP-seq. *Nucleic Acids Res*.  
933           **40**, e128 (2012).
- 934   44.   K. W. Ma *et al.*, Coordination of microbe-host homeostasis by crosstalk with plant innate  
935           immunity. *Nat Plants*. **7**, 814-825 (2021).
- 936   45.   H. Zhang *et al.*, A DTX/MATE-type transporter facilitates abscisic acid efflux and  
937           modulates ABA sensitivity and drought tolerance in Arabidopsis. *Mol Plant*. **7**, 1522-1532  
938           (2014).
- 939   46.   C. Wang *et al.*, Identification of BZR1-interacting proteins as potential components of the  
940           brassinosteroid signaling pathway in Arabidopsis through tandem affinity purification.  
941           *Mol Cell Proteomics*. **12**, 3653-3665 (2013).
- 942   47.   Y. Yu *et al.*, BRAHMA-interacting proteins BRIP1 and BRIP2 are core subunits of  
943           Arabidopsis SWI/SNF complexes. *Nat Plants*. **6**, 996-1007 (2020).
- 944   48.   Y. Yu *et al.*, Bromodomain-containing proteins BRD1, BRD2, and BRD13 are core subunits  
945           of SWI/SNF complexes and vital for their genomic targeting in Arabidopsis. *Mol Plant*. **14**,  
946           888-904 (2021).
- 947   49.   T. Hartwig *et al.*, Propiconazole is a specific and accessible brassinosteroid (BR)  
948           biosynthesis inhibitor for Arabidopsis and maize. *PLoS one*. **7**, e36625 (2012).
- 949   50.   Z. Y. Wang *et al.*, Nuclear-localized BZR1 mediates brassinosteroid-induced growth and  
950           feedback suppression of brassinosteroid biosynthesis. *Dev Cell*. **2**, 505-513 (2002).
- 951   51.   T. Asami *et al.*, Characterization of brassinazole, a triazole-type brassinosteroid  
952           biosynthesis inhibitor. *Plant Physiol*. **123**, 93-100 (2000).
- 953   52.   B. Huot, J. Yao, B. L. Montgomery, S. Y. He, Growth-defense tradeoffs in plants: a balancing  
954           act to optimize fitness. *Mol Plant*. **7**, 1267-1287 (2014).
- 955   53.   G. Xu *et al.*, uORF-mediated translation allows engineered plant disease resistance  
956           without fitness costs. *Nature*. **545**, 491-494 (2017).
- 957   54.   J. Wang *et al.*, A single transcription factor promotes both yield and immunity in rice.  
958           *Science*. **361**, 1026-1028 (2018).
- 959   55.   L. De Bruyne, M. Hofte, D. De Vleeschauwer, Connecting growth and defense: the  
960           emerging roles of brassinosteroids and gibberellins in plant innate immunity. *Mol Plant*.  
961           **7**, 943-959 (2014).
- 962   56.   M. H. Yu, Z. Z. Zhao, J. X. He, Brassinosteroid signaling in plant(-)microbe interactions. *Int*  
963           *J Mol Sci*. **19**, 4091 (2018).
- 964   57.   A. Kono, Y. Yin, Updates on BES1/BZR1 regulatory networks coordinating plant growth  
965           and stress responses. *Front Plant Sci*. **11**, 617162 (2020).
- 966   58.   K. C. Potter, J. Wang, G. E. Schaller, J. J. Kieber, Cytokinin modulates context-dependent  
967           chromatin accessibility through the type-B response regulators. *Nat Plants*. **4**, 1102-1111  
968           (2018).
- 969   59.   F. X. Wang *et al.*, Chromatin accessibility dynamics and a hierarchical transcriptional  
970           regulatory network structure for plant somatic embryogenesis. *Dev Cell*. **54**, 742-757

- 971 (2020).
- 972 60. I. Efroni *et al.*, Regulation of leaf maturation by chromatin-mediated modulation of  
973 cytokinin responses. *Dev Cell.* **24**, 438-445 (2013).
- 974 61. S. Yang *et al.*, The Arabidopsis SWI2/SNF2 chromatin remodeling ATPase BRAHMA  
975 targets directly to PINs and is required for root stem cell niche maintenance. *Plant Cell.*  
976 **27**, 1670-1680 (2015).
- 977 62. S. Kagale, K. Rozwadowski, EAR motif-mediated transcriptional repression in plants: an  
978 underlying mechanism for epigenetic regulation of gene expression. *Epigenetics.* **6**, 141-  
979 146 (2011).
- 980 63. C. Li *et al.*, Concerted genomic targeting of H3K27 demethylase REF6 and chromatin-  
981 remodeling ATPase BRM in *Arabidopsis*. *Nat Genet.* **48**, 687-693 (2016).
- 982 64. T. Noguchi *et al.*, Brassinosteroid-insensitive dwarf mutants of *Arabidopsis* accumulate  
983 brassinosteroids. *Plant Physiol.* **121**, 743-752 (1999).
- 984 65. X. Liu *et al.*, The NF-YC-RGL2 module integrates GA and ABA signalling to regulate seed  
985 germination in *Arabidopsis*. *Nat Commun.* **7**, 12768 (2016).
- 986 66. Q. Lu *et al.*, Arabidopsis homolog of the yeast TREX-2 mRNA export complex:  
987 components and anchoring nucleoporin. *Plant J.* **61**, 259-270 (2010).
- 988 67. I. A. Sparkes, J. Runions, A. Kearns, C. Hawes, Rapid, transient expression of fluorescent  
989 fusion proteins in tobacco plants and generation of stably transformed plants. *Nat Protoc.*  
990 **1**, 2019-2025 (2006).
- 991 68. Y.-C. Liu *et al.*, LjCOCH interplays with LjAPP1 to maintain the nodule development in  
992 *Lotus japonicus*. *Plant Growth Regu.* **85**, 267-279 (2018).
- 993 69. K. J. Livak, T. D. Schmittgen, Analysis of relative gene expression data using real-time  
994 quantitative PCR and the 2(-Delta Delta C(T)) Method. *Methods.* **25**, 402-408 (2001).
- 995 70. D. Kim *et al.*, TopHat2: accurate alignment of transcriptomes in the presence of insertions,  
996 deletions and gene fusions. *Genome Biol.* **14**, R36 (2013).
- 997 71. C. Trapnell *et al.*, Transcript assembly and quantification by RNA-Seq reveals unannotated  
998 transcripts and isoform switching during cell differentiation. *Nat Biotechnol.* **28**, 511-515  
999 (2010).
- 1000 72. E. A. Howe, R. Sinha, D. Schlauch, J. Quackenbush, RNA-Seq analysis in MeV.  
1001 *Bioinformatics.* **27**, 3209-3210 (2011).
- 1002 73. Z. Liang *et al.*, The transcriptional repressors VAL1 and VAL2 mediate genome-wide  
1003 recruitment of the CHD3 chromatin remodeler PICKLE in *Arabidopsis*. *Plant Cell.* **34**, 3915-  
1004 3935 (2022).
- 1005 74. B. Langmead, S. L. Salzberg, Fast gapped-read alignment with Bowtie 2. *Nat Methods.* **9**,  
1006 357-359 (2012).
- 1007 75. F. Ramírez *et al.*, deepTools2: a next generation web server for deep-sequencing data  
1008 analysis. *Nucleic Acids Res.* **44**, 160-165 (2016).
- 1009 76. G. Yu, L. G. Wang, Q. Y. He, ChIPseeker: an R/Bioconductor package for ChIP peak  
1010 annotation, comparison and visualization. *Bioinformatics.* **31**, 2382-2383 (2015).
- 1011 77. S. D. Yoo, Y. H. Cho, J. Sheen, Arabidopsis mesophyll protoplasts: a versatile cell system  
1012 for transient gene expression analysis. *Nat Protoc.* **2**, 1565-1572 (2007).
- 1013 78. C. S. Ross-Innes *et al.*, Differential oestrogen receptor binding is associated with clinical  
1014 outcome in breast cancer. *Nature.* **481**, 389-393 (2012).



1015 **Acknowledgements**

1016 We thank the Arabidopsis Biological Resource Center (ABRC) for seeds of T-DNA  
1017 insertion lines, Hongwei Xue (Shanghai Jiao Tong University) for providing *bril-5*  
1018 transgenic seeds, Prof. Junxian He (The Chinese University of Hong Kong) for  
1019 providing *bzr1-ID* seeds, Prof. Jia Li (Guangzhou University) for providing *bril-701*  
1020 seeds.

1021

1022 **Funding:** This work was supported by the National Natural Science Foundation of  
1023 China to C.L. (32270322, 32070212, and 31870289) and to Y.Y. (32200279), the  
1024 Guangdong Basic and Applied Basic Research Foundation to C.L. (2021A1515011286)  
1025 and to Y.Y. (2021A1515110386), Postdoctoral Innovation Talents Support Program to  
1026 Y.Y. (BX2021396), and the Fundamental Research Funds for the Central Universities  
1027 to C.L. (18lgzd12).

1028

1029 **Author contributions:** C.L. conceived the project. T.Z. performed most of the  
1030 experiments. C.W. generated the *bzr1-ID brm-1* double mutant. T.Z., Y.Y., and J.Z.  
1031 conducted bioinformatics analysis. T.Z., C.W., Y.Y., J.Z., Y.C., Z.W., and C.L. analyzed  
1032 data. C.L. wrote the manuscript.

1033

1034 **Competing interests:** The authors declare no competing financial interests.

1035

1036 **Data and materials availability:** The ChIP-seq, ATAC-seq, and RNA-seq datasets  
1037 have been deposited in the Gene Expression Omnibus under accession no. GSE233416  
1038 and GSE233415, respectively. The BRD1, BRD2, and BRD13 ChIP-seq data were  
1039 downloaded from GEO under accession no. GSE161595. BRIP1 and BRIP2 ChIP-seq  
1040 data were downloaded from GEO under accession no. GSE142369. The H3K27me3  
1041 ChIP-seq data were downloaded from GEO under accession no. GSE145387. The  
1042 H3K4me3 ChIP-seq data were downloaded from GEO under accession no. GSE183987.  
1043 The Pol II and H3K4me2 ChIP-seq data were downloaded from DDBJ databases under  
1044 the accession number DRR235325 and DRA010413. The H3K36me3 ChIP-seq data

1045 were downloaded from GEO under accession no. GSE205112. The H3K9ac, H3K27ac,  
1046 H4K5ac, H4K8ac, H4K12ac and H4K16ac ChIP-seq data were downloaded from GEO  
1047 under accession no. GSE183987.

1048

## 1049 **Figure legends**

### 1050 **Fig. 1. BR limitation induces the genome-wide changes of chromatin accessibility**

1051 **landscape.** (A) Scatter plot showing fold-change ( $|\log_2 \text{fold change}| \geq 0.4$ ) of accessible  
1052 peaks between WT and *bril-701*. Blue dots, stable peaks; pink dots, differential peaks.

1053 The numbers of differentially accessible peaks (increased or decreased) according to  
1054  $\text{FDR} < 0.05$ . (B) Box plots showing counts at regions that decreased accessibility and  
1055 increased accessibility in *bril-701* for the indicated ATAC-seq experiments. (C), (D)

1056 Heatmap (c) and metagene plots (d) reflecting the ATAC-seq signals over the *bril-701*  
1057 decreased, or increased chromatin accessibility sites for the indicated ATAC-seq

1058 experiments. (E) Bar chart showing the distribution of changed chromatin accessible  
1059 peaks at genic and intergenic regions in the genome. (F), (G) The G-Box element is

1060 significantly enriched in *bril-701* decreased or increased accessibility peaks. (H) Venn  
1061 diagram showing statistically significant overlaps between the BR-regulated

1062 accessibility peaks and the BZR1 binding peaks. (I) Metagene plots reflecting the  
1063 occupancy of BZR1 over the *bril-701* decreased, or increased chromatin accessibility

1064 sites. (J), (K) The correlation between the magnitude of the changes in the *bril-701*  
1065 mutants for chromatin accessibility and gene expression. (L) IGV view of ATAC-seq,

1066 RNA-seq and ChIP-seq of indicated samples at the *bril-701* decreased or increased  
1067 accessibility genes. The black diagrams underneath indicate gene structure. The y-axis

1068 scales represent shifted merged MACS2 tag counts for every 10-bp window. (M)  
1069 Cumulative distribution function plot reflecting *bril-701* down-regulated expression

1070 genes in *bril-701* decreased accessibility genes, the top one-tenth fraction reflects  
1071 genes associated with the top changed genes. (N) Cumulative distribution function plot

1072 reflecting *bril-701* up-regulated expression genes in *bril-701* increased accessibility  
1073 genes, the top one-tenth fraction reflects genes associated with the top changed genes.

1074

1075 **Fig. 2. The BZR1 interacts with BAS complex.** (A) Summary of the peptides of BRM  
1076 identified by mass spectrometry from an anti-GFP purification of a *35S:BZR1-YFP*  
1077 overexpressed line. Two biological replicates are shown. \* represents the known BZR1-  
1078 interacting protein TPL. (B) Co-immunoprecipitation showing the interaction of BZR1  
1079 with BRM-N terminal (1-952 amino acids). BRM-N-GFP was coimmunoprecipitated  
1080 with anti-HA-agarose beads from *Nicotiana benthamiana* leaves that co-expressed  
1081 BRM-N-GFP and BZR1-HA. (C) Immunoblot showing the levels of BRM-GFP and  
1082 BZR1-3xFLAG from co-IP experiments with anti-FLAG antibody in the genetic  
1083 backgrounds indicated above lanes. For each plot the antibody used is indicated on the  
1084 left, and the sizes of the protein markers are indicated on the right. (D) BiFC showing  
1085 that BZR1 interact with BRM and core members of BAS complex. An unrelated nuclear  
1086 protein encoded by *AT3G60390* was used as a negative control. error bar = 20  $\mu$ m. (E)  
1087 Schematic illustration of the BZR1 and BRM protein and its truncated versions. (F)  
1088 Yeast two-hybrid assays to examine BZR1 interact with BRM. Yeast cells transformed  
1089 with the indicated plasmids were plated onto quadruple dropout (Selective) (SC- Ade,  
1090 - His, -Leu, -Trp) medium. AD, Activation Domain; BD, Binding Domain.

1091

1092 **Fig. 3. BZR1 co-localizes with BRM genome wide.** (A) Venn diagrams displaying  
1093 statistically significant overlaps among genes occupied by BRM and BZR1. The  
1094 numbers in brackets indicate the total number of genes occupied by BRM, BZR1. *p*  
1095 values were calculated by the hypergeometric test. (B) Percentages of BRM, BZR1  
1096 binding genes (by row) overlapping with other binding genes (by column). Shading  
1097 indicates the strength of overlap. (C) Matrix depicting Person correlation coefficients  
1098 between ChIP-seq datasets, calculated using the bin mode (bin size = 1,000). (D)  
1099 Heatmap representations of ChIP-seq of BZR1, BRM, BRIP1/2, and BRD1/2/3. Rank  
1100 order is from highest to lowest BZR1-binding peaks signal.  $\log_2$  enrichment was  
1101 normalized to reads per genome coverage. Read counts per gene were averaged in 50-  
1102 nucleotide (nt) bins. (E) Heatmap representations of ChIP-seq of BZR1, BRM,  
1103 BRIP1/2, and BRD1/2/3. Rank order is from highest to lowest BRM-binding peaks  
1104 signal.  $\log_2$  enrichment was normalized to reads per genome coverage. Read counts per

1105 gene were averaged in 50-nucleotide (nt) bins. (F) Metagene plots displaying the ChIP-  
1106 seq signals of BRM at BZR1 binding peaks. (G) Metagene plots displaying the ChIP-  
1107 seq signals of BZR1 at BRM binding peaks. (H) Metagene plots displaying the ChIP-  
1108 seq signals of BRM binding peaks at 50 genes (top 50) or 100 genes (top 100) showing  
1109 decreased or increased accessibility in the *bri1-701* mutants. (I) Box plots displaying  
1110 read counts at *bri1-701* decreased or increased accessibility genes for the BRM ChIP-  
1111 seq data. Reads were summed  $\pm$  1 Kb from the peak center. Significance analysis was  
1112 determined by two tailed Mann-Whitney U test. (J) Metagene plots displaying the  
1113 ChIP-seq signals of H3K4me3, H4K5ac, and H3K27me3 at BZR1 and BRM co-  
1114 binding peaks or unique BZR1 binding peaks. (K) Box plots displaying read counts at  
1115 BZR1 and BRM co-binding peaks or unique BZR1 binding peaks for the H3K4me3,  
1116 H4K5ac, and H3K27me3 ChIP-seq data. Reads were summed  $\pm$  1 kb from the peak  
1117 center. Significance analysis was determined by two tailed Mann-Whitney U test.

1118

1119 **Fig. 4. Enhanced BRM targeting is mediated by BR at *bri1-701* decreased**  
1120 **accessibility sites.** (A) Metagene plots displaying the ChIP-seq signals of BRM at the  
1121 TSS of 50 genes (Top 50) or 100 genes (Top 100) showing decreased or increased  
1122 accessibility in the *bri1-701* mutants. (B), (C) Box plots displaying read counts of  
1123 BRM-ChIP-seq data for top 50 or top 100 *bri1-701* decreased or increased accessibility  
1124 genes. Reads were summed  $\pm$  1 Kb from the TSS. Significance analysis was determined  
1125 by two tailed Mann-Whitney U test. (D) Metagene plots displaying the ChIP-seq signals  
1126 of BRM binding peaks at 50 genes (top 50) or 100 genes (top 100) showing decreased  
1127 or increased accessibility in the *bri1-701* mutants. (E), (F) Box plots displaying read  
1128 counts of the BRM ChIP-seq data at top 50 or top 100 *bri1-701* decreased or increased  
1129 accessibility genes. Reads were summed  $\pm$  1 Kb from the peak center. Significance  
1130 analysis was determined by two tailed Mann-Whitney U test. (G) IGV view of ChIP-  
1131 seq reads of BRM at the *bri1-701* decreased or increased accessibility genes. The black  
1132 diagrams underneath indicate gene structure. The y-axis scales represent shifted merged  
1133 MACS2 tag counts for every 10-bp window. (H), (I) Validation of the occupancy at the  
1134 selected sites by ChIP-qPCR in the indicated transgenic plants. Mean  $\pm$  s.d. from three

1135 biological replicates. Statistical significance was determined by two-tailed Student's t-  
1136 test; \*\*  $p < 0.01$ . ns, not significant. (J), (K) RT-qPCR and immunoblot analysis  
1137 showing the relative RNA and protein levels of BRM with treatment of DMSO or 2 $\mu$ M  
1138 PPZ. (L) Cumulative distribution function plot reflecting genes nearest to BRM  
1139 decreased sites in *bri1-701* decreased accessibility genes, the top one-tenth fraction  
1140 reflects genes associated with the top changed genes.

1141

1142 **Fig. 5. BZR1 requires BRM to increase chromatin accessibility.** (A) Metagene plots  
1143 reflecting the ATAC-seq signals over BZR1 increased chromatin accessibility peaks for  
1144 the indicated ATAC-seq experiments. Seedlings were grown in the dark with 2  $\mu$ M PPZ  
1145 for five days. (B) Box plot displaying read counts over the BZR1 increased chromatin  
1146 accessibility peaks for the indicated ATAC-seq experiments. Reads were summed  $\pm$  1  
1147 Kb from the peaks center. Significance analysis was determined by two tailed Mann-  
1148 Whitney U test. (C) Heatmap reflecting the ATAC-seq signals over the increased  
1149 chromatin accessibility peaks by *bzr1-D* for the indicated ATAC-seq experiments. (D)  
1150 Metagene plots reflecting the ATAC-seq signals over BZR1 decreased chromatin  
1151 accessibility peaks for the indicated ATAC-seq experiments. Seedlings were grown in  
1152 the dark with 2  $\mu$ M PPZ for five days. (E) Box plot displaying read counts over the  
1153 BZR1 decreased chromatin accessibility peaks for the indicated ATAC-seq experiments.  
1154 Reads were summed  $\pm$  1 Kb from the peaks center. Significance analysis was  
1155 determined by two tailed Mann-Whitney U test. (F) Heatmap reflecting the ATAC-seq  
1156 signals over the decreased chromatin accessibility peaks by *bzr1-D* for the indicated  
1157 ATAC-seq experiments. (G), (H) PCA analysis of *bzr1-ID* increased or decreased  
1158 accessibility peaks in Col, *bzr1-ID*, *brm-1* and *bzr1-ID brm-1* samples. Percentages  
1159 represent variance captured by PC1 and PC2 in each analysis. (I) Examples of ATAC-  
1160 seq tracks at representative loci in the Col, *bzr1-ID*, *brm-1* and *bzr1-ID brm-1* samples.

1161

1162 **Fig. 6. Loss of BRM compromises the elongation of hypocotyl and downregulates**  
1163 **cell elongation related genes.** (A) The *brm-1* mutant is hypersensitive to PPZ.  
1164 Seedlings were grown on various concentrations of PPZ in the dark for five days. The

1165 error bars in the lower graph indicate the s.d. (n = 10 plants) and \*\*  $p < 0.01$ . Scale bar,  
1166 10 mm. (B) The loss of BRM inhibits the promotion of hypocotyl elongation.  
1167 Seedlings were grown in the dark for five days. The error bars in the lower graph  
1168 indicate the s.d. (n = 10 plants). Lowercase letters indicate statistical significance  
1169 determined by the Student's t test. Scale bar, 10 mm. (C) *bzr1-ID* under the *brm-1*  
1170 background cannot promote hypocotyl elongation in the dark. Seedlings were grown  
1171 on medium either with DMSO or 2  $\mu$ M PPZ or 2  $\mu$ M BRZ in the dark for five days.  
1172 The error bars in the lower graph indicate the s.d. (n = 10 plants). Scale bar, 10 mm. (D)  
1173 Relative expression of *PRE1*, *SAUR50* and *IAA19* in 5-day-old seedlings grown in dark  
1174 conditions. *ACTIN2* served as the internal control. Mean  $\pm$  s.d. from three biological  
1175 replicates. Lowercase letters indicate statistical significance determined by the  
1176 Student's t test.

1177

1178 **Fig. 7. BRM determines BR-mediated gene activation, but has no effect on BR-**  
1179 **mediated gene repression to a large extent.** (A) Volcano plots showing differentially  
1180 expressed genes ( $|\log_2(\text{fold change})| \geq 1$ ) in the *bzr1-ID* mutants, determined by RNA-  
1181 seq. (B) Heatmap (left) and box blot (right) showing the classes of BZR1 up-regulated  
1182 genes sorted by k-means clustering across the samples collected from Col, *bzr1-ID*,  
1183 *brm-1*, *bzr1-ID brm-1* samples. Color bar, RNA z-score of the differentially expressed  
1184 genes identified by RNA-seq. The number of the genes for each cluster is given. (C)  
1185 Heatmap (left) and box blot (right) showing the classes of BZR1 down-regulated genes  
1186 sorted by k-means clustering across the samples collected from Col, *bzr1-ID*, *brm-1*,  
1187 *bzr1-ID brm-1* samples. Color bar, RNA z-score of the differentially expressed genes  
1188 identified by RNA-seq. The number of the genes for each cluster is given. (D) Heatmaps  
1189 reflecting the relative expression changes (z-normalized) of BZR1 up or down-  
1190 regulated genes for the indicated RNA-seq experiments. (E) Comparative expression  
1191 analyses of BRM-dependent BZR1 up-regulated genes in diverse developmental  
1192 programmers. Heatmap of RNA-seq data from triplicate biological samples prepared  
1193 from Col, *bzr1-ID*, *brm-1*, *bzr1-ID brm-1* seedlings. (F) Heat map displaying the  
1194 chromatin accessible and transcriptional relative level (z-normalized) at BZR1 up-

1195 regulated genes in both transcription and chromatin accessibility for indicated samples.  
1196 z-score values of chromatin accessibility and gene expression in indicated samples were  
1197 also displayed. (G) Box blot displaying the chromatin accessible and transcriptional  
1198 relative level (z-normalized) at BZR1 up-regulated genes in both transcription and  
1199 chromatin accessibility for indicated samples. (H) Gene ontology analysis using 157  
1200 genes in F.

1201

1202 **Fig. 8. Model of the BR-BZR1-BAS signaling network governing diverse**  
1203 **developmental programs.** (A) The BR-BZR1-BAS-mediated transcriptional

1204 activation signaling network. BR-activated BZR1 interacts with and recruits the BAS  
1205 complexes to the G-box-like containing genes, where BAS enhances chromatin  
1206 accessibility and activate gene expression to support a range of plant growth and  
1207 developmental processes, including fruit and seed development, hypocotyl elongation,  
1208 root growth, leaf expansion, flowering transition, and floral organ formation. This  
1209 molecular mechanism establishes a direct and global mechanistic connection between  
1210 hormones and chromatin accessibility during plant growth and development process.

1211 (B) The BR-BZR1-TPL-HDA19-mediated transcriptional repression signaling network.  
1212 BZR1-TPL-HDA19 complexes bind to the G-box-like motifs in the stress-responsive  
1213 genes and inhibit their expression to help balance the trade-off between growth and  
1214 stress response.

1215

1216 **Fig. S1. Genome-wide changes of chromatin accessibility and RNA transcription**  
1217 **in the loss of BR signaling.** (A), (B) Heatmap (A) and metagene plots (B) reflecting

1218 the ATAC-seq signals over the unchanged chromatin accessibility sites for the indicated  
1219 ATAC-seq experiments. (C) The G-Box element is significantly enriched in *bri1-701*  
1220 regulated accessibility peaks. (D) IGV view of BZR1 ChIP-seq at the known BZR1-  
1221 targeted genes. The black diagrams underneath indicate gene structure. The y-axis  
1222 scales represent shifted merged MACS2 tag counts for every 10-bp window. (E)  
1223 Validation of the occupancy at the selected sites by ChIP-qPCR in the indicated  
1224 transgenic plants. Mean  $\pm$  s.d. from three biological replicates. Statistical significance

1225 was determined by two-tailed Student's t-test; \*\*  $p < 0.01$ . (F) The percentage of BZR1  
1226 targeted genes showing decreased and increased chromatin accessibility in the *bri1-701*  
1227 mutants. (G) Volcano plots showing differentially expressed genes ( $|\log_2(\text{fold change})|$   
1228  $\geq 1$ ) in the *bri1-701* mutants, determined by RNA-seq. (H) Overlap analysis of genes  
1229 showing down-regulated and up-regulated in chromatin accessibility and RNA  
1230 expression in the *bri1-701* mutants. The x axis represents the observed/expected score.  
1231 The  $p$  values were calculated by hypergeometric tests. (I) Box plot depicts the  $\log_2$  (fold  
1232 change) in RNA-seq for *bri1-701* decreased chromatin accessibility genes and *bri1-701*  
1233 increased chromatin accessibility genes. (J) Gene ontology analysis of genes showing  
1234 down-regulated in chromatin accessibility and genes expression in the *bri1-701* mutants.  
1235 (K) Gene ontology analysis of genes showing up-regulated in chromatin accessibility  
1236 and gene expression in the *bri1-701* mutants.

1237

1238 **Fig. S2. Physical association of BZR1 and BAS complex.** (A) to (E) Co-IP assays  
1239 showing the interaction of BZR1 with BRIP1/2, BRD2/13, and SWP73A. BZR1 was  
1240 coimmunoprecipitated with anti-FLAG-agarose beads from *Nicotiana benthamiana*  
1241 leaves that co-expressed BRIP1/2-HA, BRD2/13-HA, SWP73A-HA and BZR1-FLAG.  
1242 (F) BiFC showing that BZR1 interact with core members of BAS complex. An  
1243 unrelated nuclear protein encoded by *AT3G60390* was used as a negative control. error  
1244 bar = 20  $\mu\text{m}$ . (G) Yeast two-hybrid assays to examine BZR1 interact with core members  
1245 of BAS complex. Yeast cells transformed with the indicated plasmids were plated onto  
1246 double dropout (Non-selective) (SC-Leu, -Trp) or quadruple dropout (Selective) (SC-  
1247 Ade, - His, -Leu, -Trp) medium. AD, Activation Domain; BD, Binding Domain. (H)  
1248 On the top, schematic illustration of the BZR1 and its truncated versions. At the bottom,  
1249 yeast two-hybrid assays to examine EAR domain of BZR interacts with SWP73A. Yeast  
1250 cells transformed with the indicated plasmids were plated onto quadruple dropout  
1251 (Selective) (SC- Ade, - His, -Leu, -Trp) medium. AD, Activation Domain; BD, Binding  
1252 Domain.

1253

1254 **Fig. S3. BZR1 and BRM co-occupancy.** (A) Pie charts showing the distribution of



1255 BZR1 and BRM peaks at genic and intergenic regions in the genome. (B), (C) The  
1256 average enrichment of BZR1 or BRM over its target genes. Plotting regions were scaled  
1257 to the same length as follows: 5' ends (-3.0 kb to transcription starting site (TSS)) and  
1258 3' ends (transcription stop site (TTS) to downstream 3.0 kb), and the gene body was  
1259 scaled to 2.0 kb. (D) The G-Box has a significant enrichment in the BRM and BZR1  
1260 overlapped MACS-called peaks. (E) Heatmap representations of ChIP-seq of BZR1,  
1261 BRM, BRIP1/2, and BRD1/2/3. Rank order is from highest to lowest BZR1 signal.  $\log_2$   
1262 enrichment was normalized to reads per genome coverage. Read counts per gene were  
1263 averaged in 50-nucleotide (nt) bins. (F) Heatmap representations of ChIP-seq of BZR1,  
1264 BRM, BRIP1/2, and BRD1/2/3. Rank order is from highest to lowest BRM signal.  $\log_2$   
1265 enrichment was normalized to reads per genome coverage. Read counts per gene were  
1266 averaged in 50-nucleotide (nt) bins. (G) Metagene plots displaying the ChIP-seq signals  
1267 of BRM at the TSS of 50 genes (top 50) or 100 genes (top 100) showing decreased or  
1268 increased accessibility in the *bri1-701* mutants. (H) Box plots displaying read counts  
1269 for the BRM ChIP-seq data at *bri1-701* decreased or increased accessibility genes.  
1270 Reads were summed  $\pm$  1 kb from the TSS. Significance analysis was determined by two  
1271 tailed Mann-Whitney U test.

1272

1273 **Fig. S4. Metagene plots displaying the ChIP-seq signals of different histone**  
1274 **modifications at BZR1 and BRM co-binding peaks or unique BZR1 binding peaks.**

1275 (A) Box plots displaying read counts at BZR1 and BRM co-binding peaks or unique  
1276 BZR1 binding peaks for the H3K9ac, H3K27ac, H4K8ac, H4K12ac, H4K16ac,  
1277 H3K4me2, H3K36me3, and Pol II ChIP-seq data. Reads were summed  $\pm$  1 kb from the  
1278 peak center. Significance analysis was determined by two tailed Mann-Whitney U test.

1279 (B) Metagene plots displaying the ChIP-seq signals of H3K9ac, H3K27ac, H4K8ac,  
1280 H4K12ac, H4K16ac, H3K4me2, H3K36me3, and Pol II at BZR1 and BRM co-binding  
1281 peaks or unique BZR1 binding peaks. (C) The proportion of at BZR1 and BRM co-  
1282 binding peaks or unique BZR1 binding genes overlapping with specified chromatin  
1283 features.

1284

1285 **Fig. S5. The occupancy of BZR1 is decreased with PPZ treatment.** (A), (B)  
1286 Hypocotyl elongation phenotypes of *BZR1-YFP* seedlings were shown in dark for 5  
1287 days on 1/2 MS medium with DMSO or 2  $\mu$ M PPZ. The hypocotyl lengths of the  
1288 indicated genotypes were measured and are shown in B. Data are means  $\pm$  SD. n=10.  
1289 Scale bars, 10 mm. (C) Immunoblot analysis showing the relative protein levels of  
1290 BZR1 with treatment of DMSO or 2 $\mu$ M PPZ. (D) Validation of BZR1 enrichment at  
1291 *IAA19* and *SAUR15* loci by ChIP-qPCR with treatment of DMSO or 2 $\mu$ M PPZ.

1292

1293 **Fig. S6. BR enhances BRM enrichment signal at *bri1-701* decreased accessibility**  
1294 **sites.** (A) Metagene plots displaying the ChIP-seq signals of BRM at the TSS of *bri1-*  
1295 *701* decreased or increased accessibility genes. (B) Box plots displaying read counts  
1296 for the BRM ChIP-seq data at *bri1-701* decreased or increased accessibility genes.  
1297 Reads were summed  $\pm$  1 kb from the TSS. Significance analysis was determined by two  
1298 tailed Mann-Whitney U test. (C) Metagene plots displaying the ChIP-seq signals of  
1299 BRM binding peaks at *bri1-701* decreased or increased accessibility genes. (D) Box  
1300 plots displaying read counts for the BRM ChIP-seq data at *bri1-701* decreased or  
1301 increased accessibility genes. Reads were summed  $\pm$  1 kb from the peaks center.  
1302 Significance analysis was determined by two tailed Mann-Whitney U test.

1303

1304 **Fig. S7. *brm-1* and *bri1-701* showed a similar decline in accessibility at BRM**  
1305 **binding decreased sites.** (A), (B) Heatmap (A) and metagene plots (B) reflecting the  
1306 ChIP-seq signal and ATAC-seq signal at the decreased, or increased BRM binding sites.  
1307 (C), (D) Box plots displaying read counts for the BRM ChIP-seq or ATAC-seq data at  
1308 BRM binding decreased or BRM binding increased peaks. Reads were summed  $\pm$  1 Kb  
1309 from the peaks center. Significance analysis was determined by two tailed Mann-  
1310 Whitney U test.

1311

1312 **Fig. S8. The loss of BRM results in a decline in chromatin accessibility at *bri1-701***  
1313 **decreased accessibility sites.** (A), (B) Metagene plots reflecting the ATAC-seq signals  
1314 over the *bri1-701* decreased or increased chromatin accessibility sites for the indicated

1315 ATAC-seq experiments. (C) Box plot displaying read counts over the decreased or  
1316 increased chromatin accessibility sites for the indicated ATAC-seq experiments. Reads  
1317 were summed  $\pm$  1 kb from the peaks center. Significance analysis was determined by  
1318 two tailed Mann-Whitney U test. (D) Examples of ATAC-seq tracks at representative  
1319 loci in the Col, *bri1-701* and *brm-1* mutants.

1320

1321 **Fig. S9. *bzr1-ID* rescues the changes of chromatin accessibility with treatment of**  
1322 **PPZ.** (A) Scatter plot showing fold-change ( $|\log_2$  fold change|  $\geq$  0.4) of accessible  
1323 peaks between WT and *bzr1-ID*. Blue dots, stable peaks; pink dots, differential peaks.  
1324 The numbers of differentially accessible peaks (increased or decreased) according to  
1325 FDR are indicated. (B) Box plots showing read counts at regions that had increased and  
1326 decreased accessibility in *bzr1-ID* for the indicated ATAC-seq experiments.  
1327 Significance analysis was determined by two tailed Mann-Whitney U test. (C) Bar chart  
1328 showing the distribution of changed chromatin accessible peaks in the *bzr1-ID* mutants  
1329 at genic and intergenic regions in the genome. (D), (E) Metagene plots and box plot  
1330 reflecting the ATAC-seq signals over the BZR1 increased chromatin accessibility  
1331 regions for the indicated assays. Significance analysis was determined by two tailed  
1332 Mann-Whitney U test. (F), (G) Metagene plots and box plot reflecting the ATAC-seq  
1333 signals over the BZR1 decreased chromatin accessibility regions for the indicated  
1334 assays. Significance analysis was determined by two tailed Mann-Whitney U test.

1335

1336 **Fig. S10. Loss of BAS complex reduces hypocotyl elongation.** (A) The hypocotyl  
1337 elongation phenotype of indicated lines grown in dark for five days. The error bars in  
1338 the right graph indicate the s.d. (n = 10 plants). Lowercase letters indicate statistical  
1339 significance determined by the Student's t test. Scale bars, 10 mm. (B) The loss of core  
1340 subunits of MAS inhibits the promotion of hypocotyl elongation. Seedlings were grown  
1341 in the dark for five days. Lowercase letters indicate statistical significance determined  
1342 by the Student's t test. Scale bar, 10 mm.

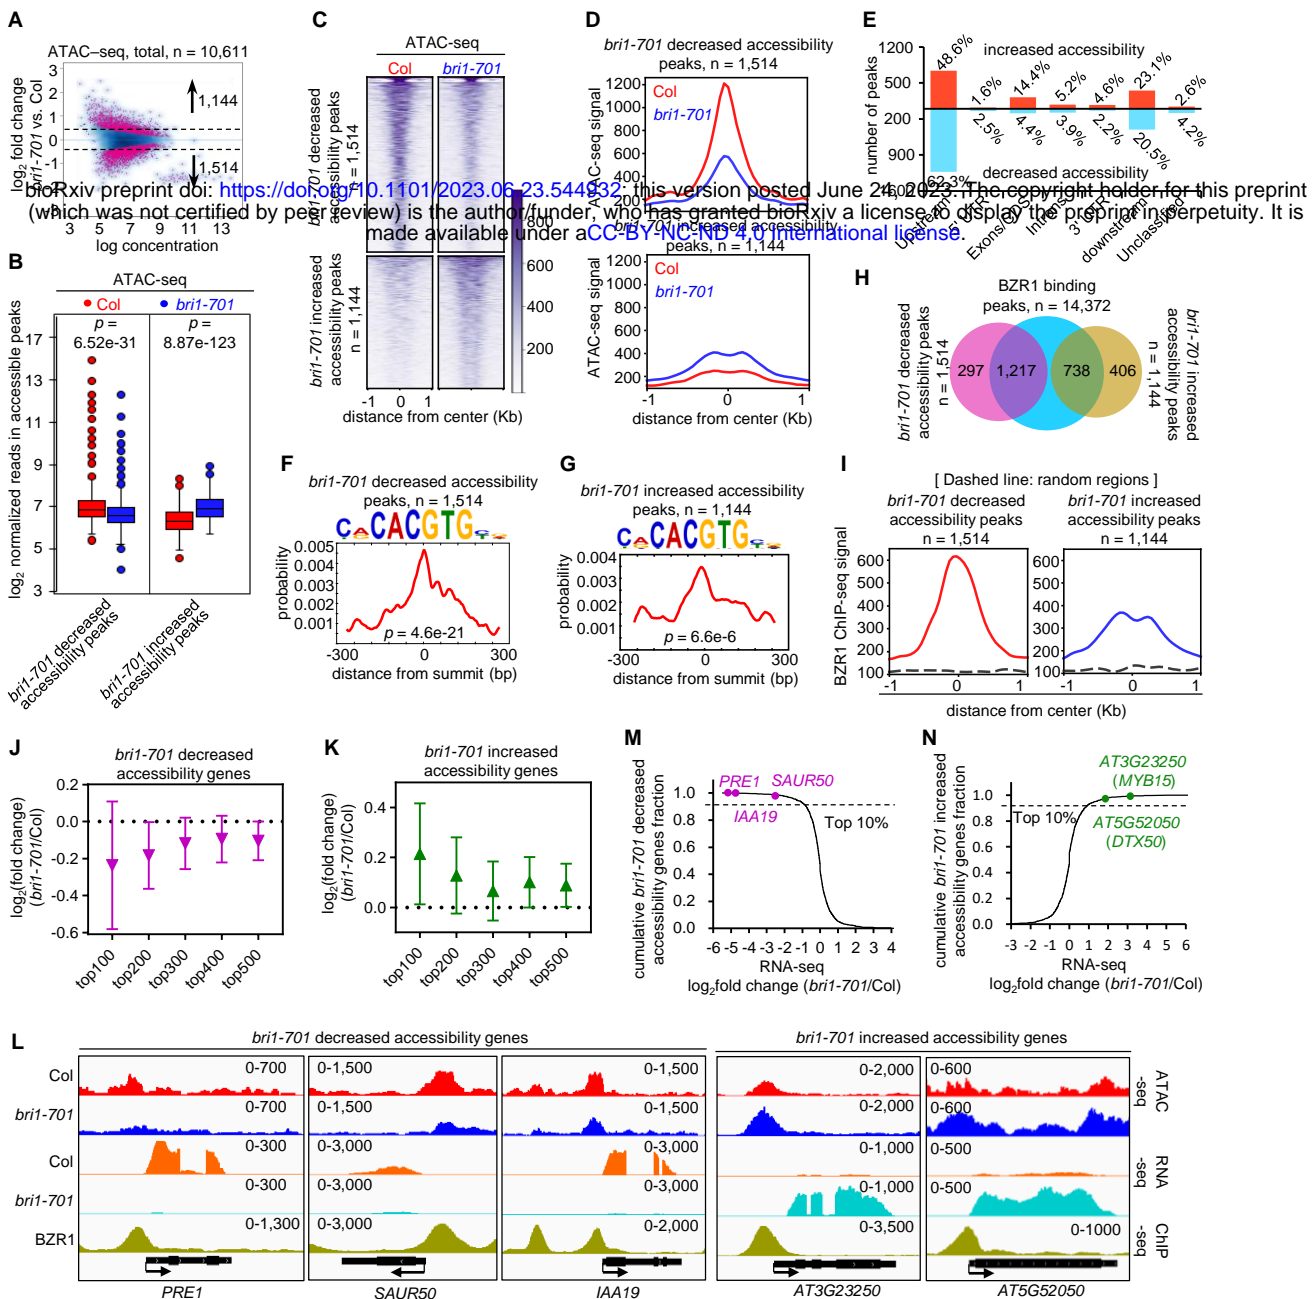

**Fig. 1. BR limitation induces the genome wide changes of chromatin accessibility landscape.**

(A) Scatter plot showing fold-change ( $|\log_2$  fold change $|\geq 0.4$ ) of accessible peaks between WT and *bri1-701*. Blue dots, stable peaks; pink dots, differential peaks. The numbers of differentially accessible peaks (increased or decreased) according to FDR  $< 0.05$ . (B) Box plots showing counts at regions that decreased accessibility and increased accessibility in *bri1-701* for the indicated ATAC-seq experiments. (C), (D) Heatmap (C) and metagene plots (D) reflecting the ATAC-seq signals over the *bri1-701* decreased, or increased chromatin accessibility sites for the indicated ATAC-seq experiments. (E) Bar chart showing the distribution of changed chromatin accessible peaks at genic and intergenic regions in the genome. (F), (G) The G-Box element is significantly enriched in *bri1-701* decreased or increased accessibility peaks. (H) Venn diagram showing statistically significant overlaps between the BR-regulated accessibility peaks and the BZR1 binding peaks. (I) Metagene plots reflecting the occupancy of BZR1 over the *bri1-701* decreased, or increased chromatin accessibility sites (J), (K) The correlation between the magnitude of the changes in the *bri1-701* mutants for chromatin accessibility and gene expression. (L) IGV view of ATAC-seq, RNA-seq and ChIP-seq of indicated samples at the *bri1-701* decreased or increased accessibility genes. The black diagrams underneath indicate gene structure. The y-axis scales represent shifted merged MACS2 tag counts for every 10-bp window. (M) Cumulative distribution function plot reflecting *bri1-701* down-regulated expression genes in *bri1-701* decreased accessibility genes, the top one-tenth fraction reflects genes associated with the top changed genes. (N) Cumulative distribution function plot reflecting *bri1-701* up-regulated expression genes in *bri1-701* increased accessibility genes, the top one-tenth fraction reflects genes associated with the top changed genes.

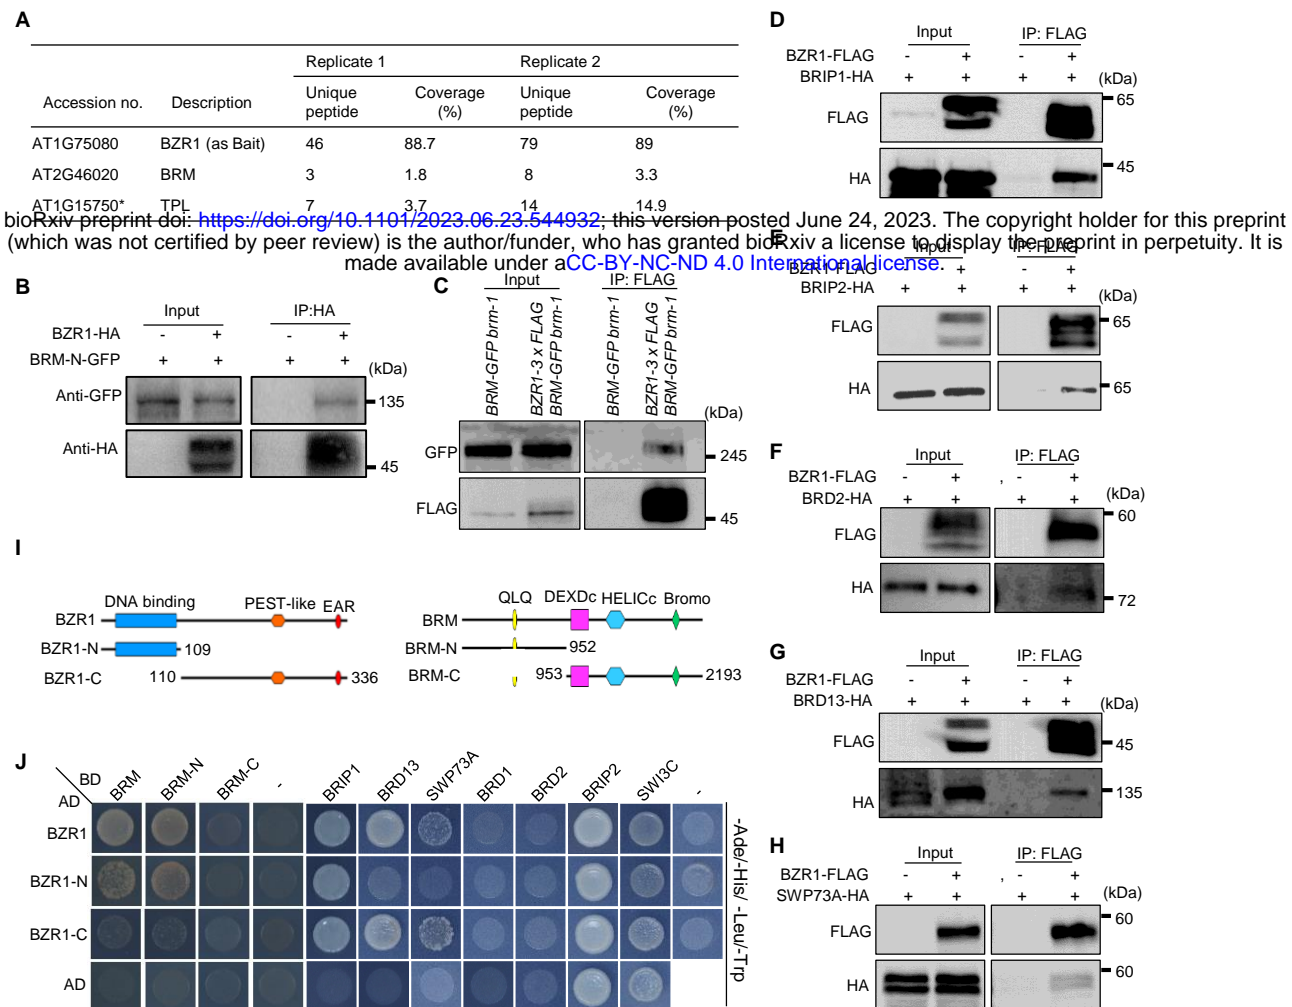

**Fig. 2. The BZR1 interacts with BAS complex.**

(A) Summary of the peptides of BRM identified by mass spectrometry from an anti-GFP purification of a *35S::BZR1-YFP* overexpressed line. Two biological replicates are shown. \* represents the known BZR1-interacting protein TPL. (B) Co-IP showing the interaction of BZR1 with BRM-N terminal (1-952 amino acids). BRM-N-GFP was coimmunoprecipitated with anti-HA-agarose beads from *Nicotiana benthamiana* leaves that co-expressed BRM-N-GFP and BZR1-HA. (C) Immunoblot showing the levels of BRM-GFP and BZR1-3xFLAG from co-IP experiments with anti-FLAG antibody in the genetic backgrounds indicated above lanes. For each plot the antibody used is indicated on the left, and the sizes of the protein markers are indicated on the right. (D) to (H) Co-IP assays showing the interaction of BZR1 with BRIP1/2, BRD2/13, and SWP73A. BZR1 was coimmunoprecipitated with anti-FLAG-agarose beads from *Nicotiana benthamiana* leaves that co-expressed BRIP1/2-HA, BRD2/13-HA, SWP73A-HA and BZR1-FLAG. (I) Schematic illustration of the BZR1 and BRM protein and its truncated versions. (J) Yeast two-hybrid assays to examine BZR1 interact with BRM and core members of BAS complex. Yeast cells transformed with the indicated plasmids were plated onto quadruple dropout (Selective) (SC- Ade, - His, -Leu, -Trp) medium. AD, Activation Domain; BD, Binding Domain.

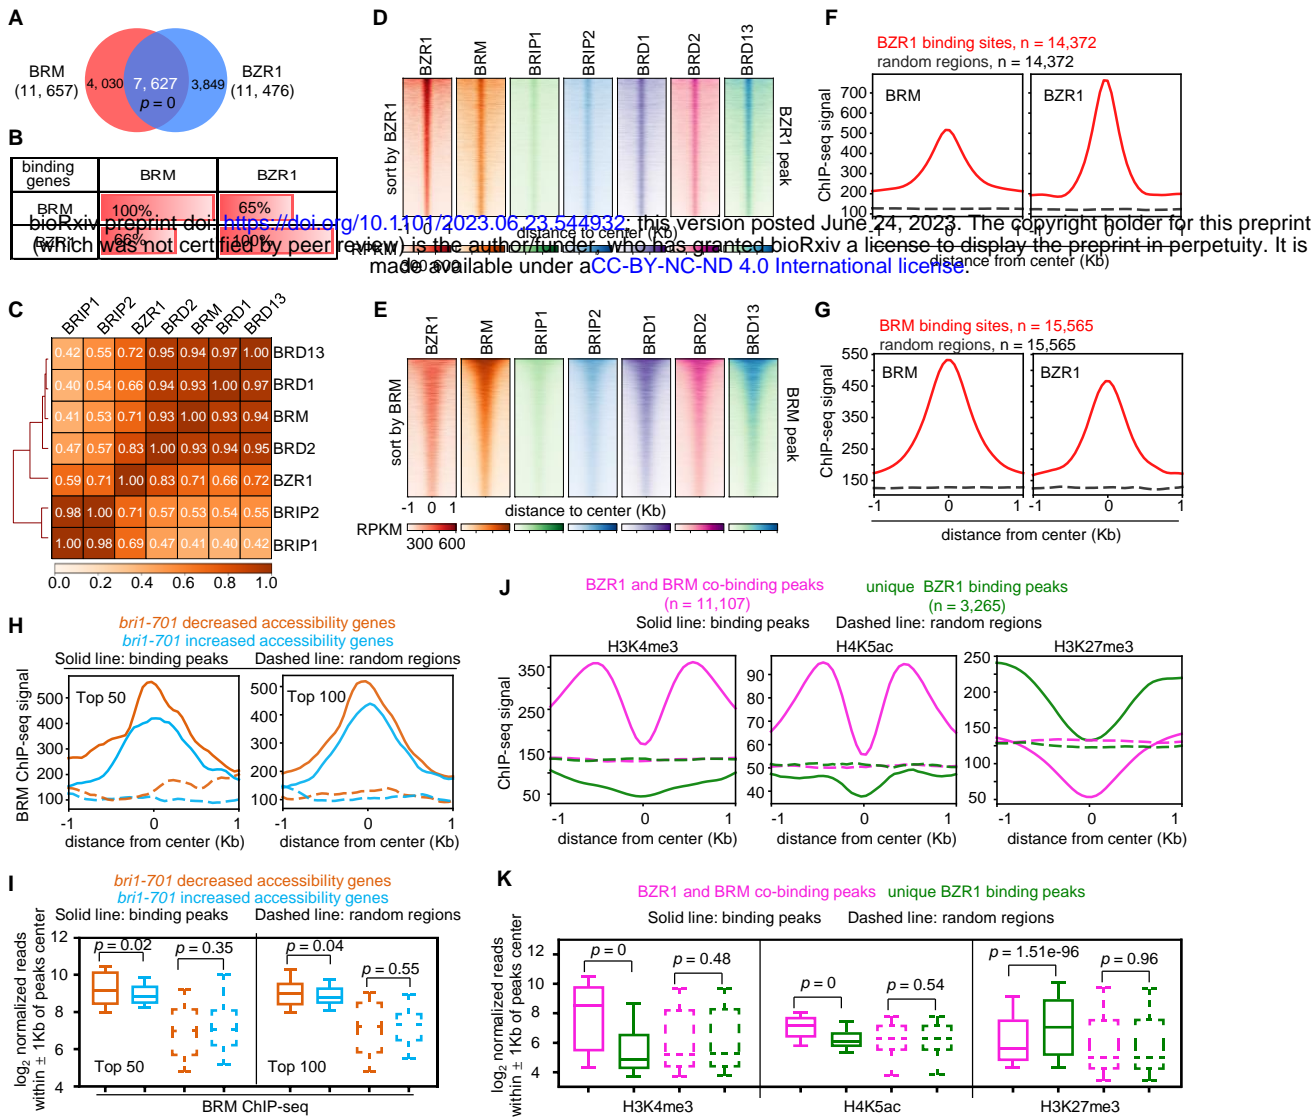

**Fig. 3. BZR1 co-localizes with BRM genome wide.**

(A) Venn diagrams displaying statistically significant overlaps among genes occupied by BRM and BZR1. The numbers in brackets indicate the total number of genes occupied by BRM, BZR1.  $p$  values were calculated by the hypergeometric test. (B) Percentages of BRM, BZR1 binding genes (by row) overlapping with other binding genes (by column). Shading indicates the strength of overlap. (C) Matrix depicting Pearson correlation coefficients between ChIP-seq datasets, calculated using the bin mode (bin size = 1,000). (D) Heatmap representations of ChIP-seq of BZR1, BRM, BRIP1/2, and BRD1/2/3. Rank order is from highest to lowest BZR1-binding peaks signal.  $\log_2$  enrichment was normalized to reads per genome coverage. Read counts per gene were averaged in 50-nucleotide (nt) bins. (E) Heatmap representations of ChIP-seq of BZR1, BRM, BRIP1/2, and BRD1/2/3. Rank order is from highest to lowest BRM-binding peaks signal.  $\log_2$  enrichment was normalized to reads per genome coverage. Read counts per gene were averaged in 50-nucleotide (nt) bins. (F) Metagene plots displaying the ChIP-seq signals of BRM at BZR1 binding peaks. (G) Metagene plots displaying the ChIP-seq signals of BZR1 at BRM binding peaks. (H) Metagene plots displaying the ChIP-seq signals of BRM binding peaks at 50 genes (top 50) or 100 genes (top 100) showing decreased or increased accessibility in the *bri1-701* mutants. (I) Box plots displaying read counts at *bri1-701* decreased or increased accessibility genes for the BRM ChIP-seq data. Reads were summed  $\pm 1$  Kb from the peak center. Significance analysis was determined by two tailed Mann-Whitney U test. (J) Metagene plots displaying the ChIP-seq signals of H3K4me3, H4K5ac, and H3K27me3 at BZR1 and BRM co-binding peaks or unique BZR1 binding peaks. (K) Box plots displaying read counts at BZR1 and BRM co-binding peaks or unique BZR1 binding peaks for the H3K4me3, H4K5ac, and H3K27me3 ChIP-seq data. Reads were summed  $\pm 1$  kb from the peak center. Significance analysis was determined by two tailed Mann-Whitney U test.

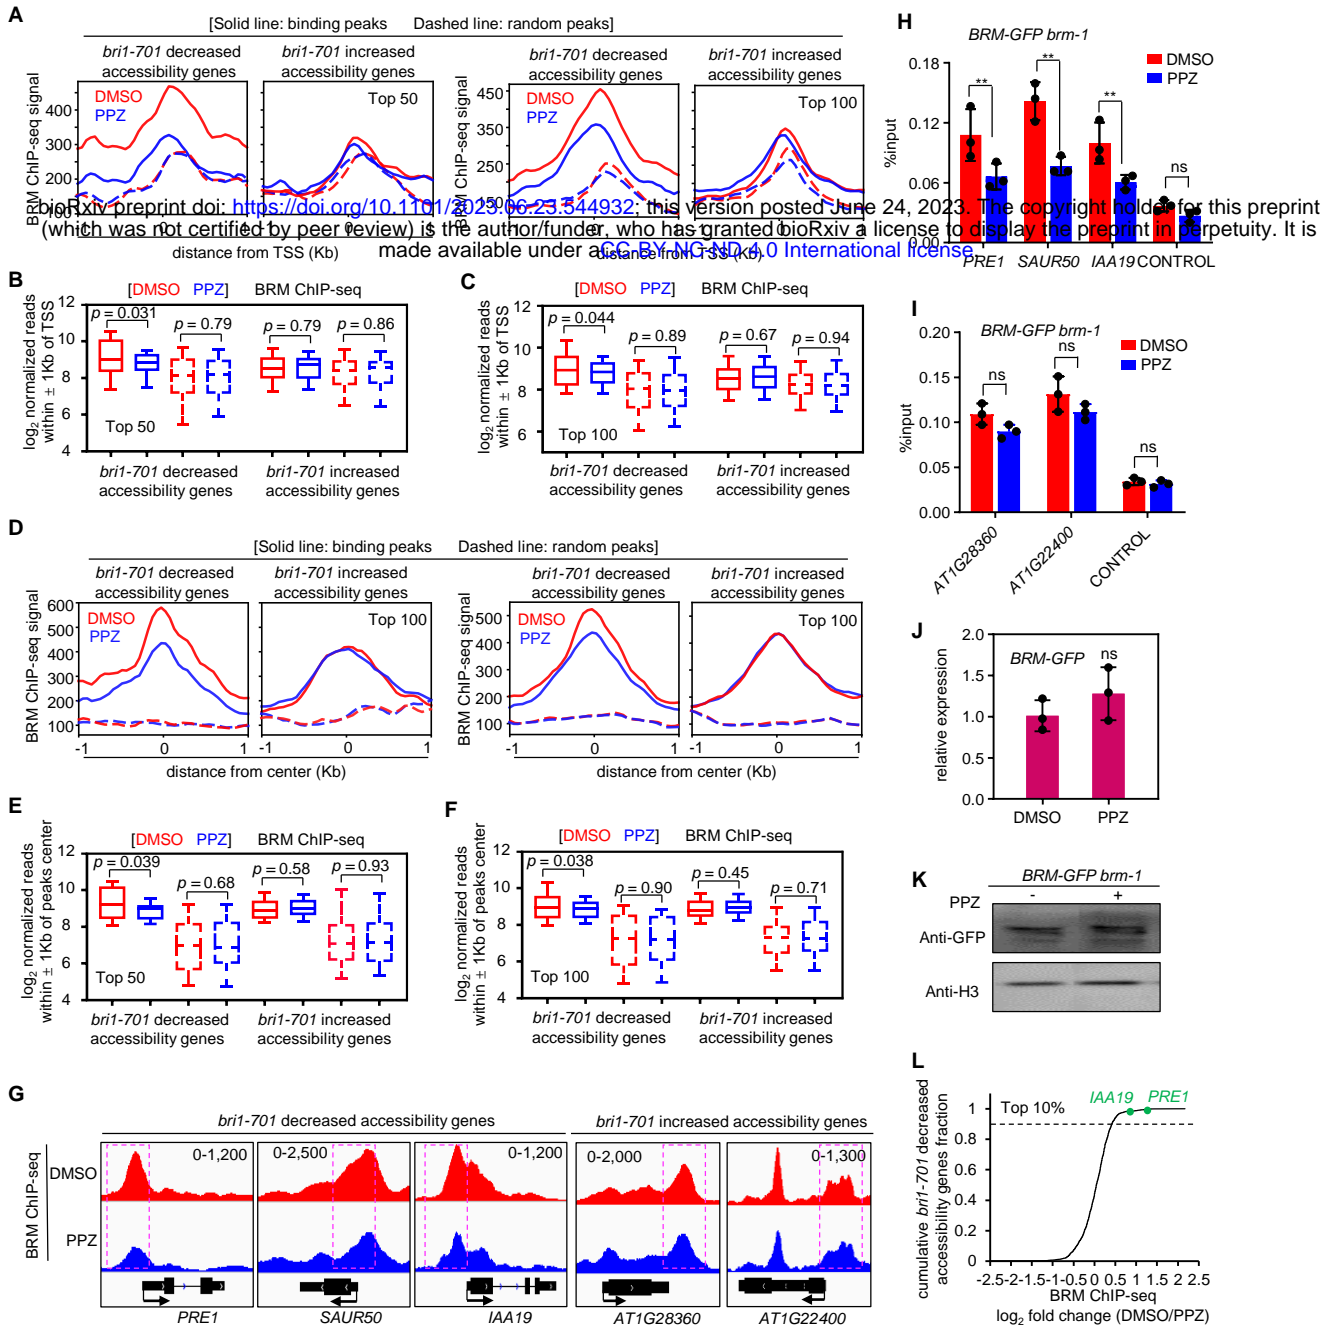

**Fig. 4. Enhanced BRM targeting is mediated by BR at *bri1-701* decreased accessibility sites.**

(A) Metagene plots displaying the ChIP-seq signals of BRM at the TSS of 50 genes (top 50) or 100 genes (top 100) showing decreased or increased accessibility in the *bri1-701* mutants. (B), (C) Box plots displaying read counts of BRM-ChIP-seq data for Top 50 or Top 100 *bri1-701* decreased or increased accessibility genes. Reads were summed  $\pm 1$  Kb from the TSS. Significance analysis was determined by two tailed Mann-Whitney U test. (D) Metagene plots displaying the ChIP-seq signals of BRM binding peaks at 50 genes (top 50) or 100 genes (top 100) showing decreased or increased accessibility in the *bri1-701* mutants. (E), (F) Box plots displaying read counts of the BRM ChIP-seq data at top 50 or top 100 *bri1-701* decreased or increased accessibility genes. Reads were summed  $\pm 1$  Kb from the peak center. Significance analysis was determined by two tailed Mann-Whitney U test. (G) IGV view of ChIP-seq reads of BRM at the *bri1-701* decreased or increased accessibility genes. The black diagrams underneath indicate gene structure. The y-axis scales represent shifted merged MACS2 tag counts for every 10-bp window. (H), (I) Validation of the occupancy at the selected sites by ChIP-qPCR in the indicated transgenic plants. Mean  $\pm$  s.d. from three biological replicates. Statistical significance was determined by two-tailed Student's t-test; \*\*  $p < 0.01$ . ns, not significant. (J), (K) RT-qPCR and immunoblot analysis showing the relative RNA and protein levels of BRM with treatment of DMSO or 2 $\mu$ M PPZ. (L) Cumulative distribution function plot reflecting genes nearest to BRM decreased sites in *bri1-701* decreased accessibility genes, the top one-tenth fraction reflects genes associated with the top changed genes.

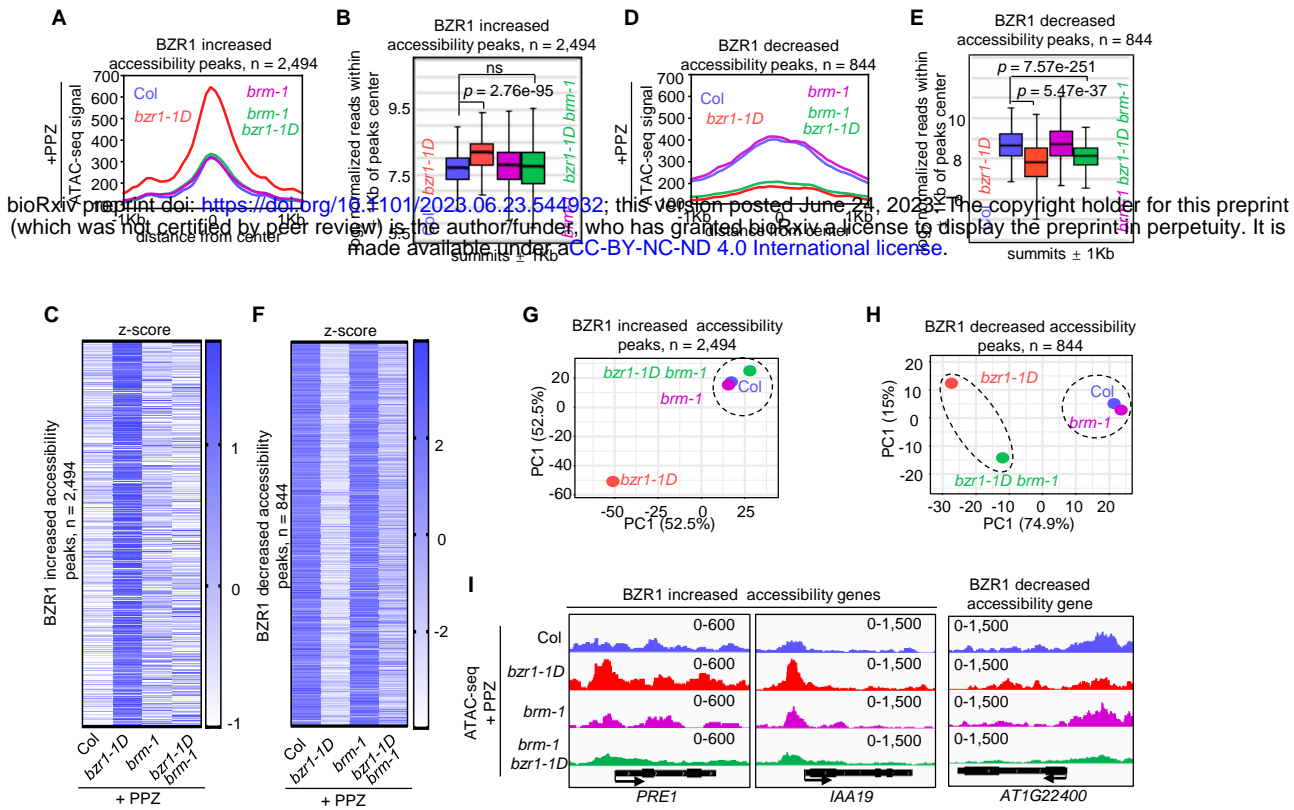

**Fig. 5. BZR1 requires BRM to increase chromatin accessibility.**

(A) Metagene plots reflecting the ATAC-seq signals over BZR1 increased chromatin accessibility peaks for the indicated ATAC-seq experiments. Seedlings were grown in the dark with 2 $\mu$ M PPZ for five days. (B) Box plot displaying read counts over the BZR1 increased chromatin accessibility peaks for the indicated ATAC-seq experiments. Reads were summed  $\pm$  1 Kb from the peaks center. Significance analysis was determined by two tailed Mann-Whitney U test. (C) Heatmap reflecting the ATAC-seq signals over the increased chromatin accessibility peaks by *bzr1-D* for the indicated ATAC-seq experiments. (D) Metagene plots reflecting the ATAC-seq signals over BZR1 decreased chromatin accessibility peaks for the indicated ATAC-seq experiments. Seedlings were grown in the dark with 2 $\mu$ M PPZ for five days. (E) Box plot displaying read counts over the BZR1 decreased chromatin accessibility peaks for the indicated ATAC-seq experiments. Reads were summed  $\pm$  1 Kb from the peaks center. Significance analysis was determined by two tailed Mann-Whitney U test. (F) Heatmap reflecting the ATAC-seq signals over the decreased chromatin accessibility peaks by *bzr1-D* for the indicated ATAC-seq experiments. (G), (H) PCA analysis of *bzr1-1D* increased or decreased accessibility peaks in Col, *bzr1-1D*, *brm-1* and *bzr1-1D brm-1* samples. Percentages represent variance captured by PC1 and PC2 in each analysis. (I) Examples of ATAC-seq tracks at representative loci in the Col, *bzr1-1D*, *brm-1* and *bzr1-1D brm-1* samples.



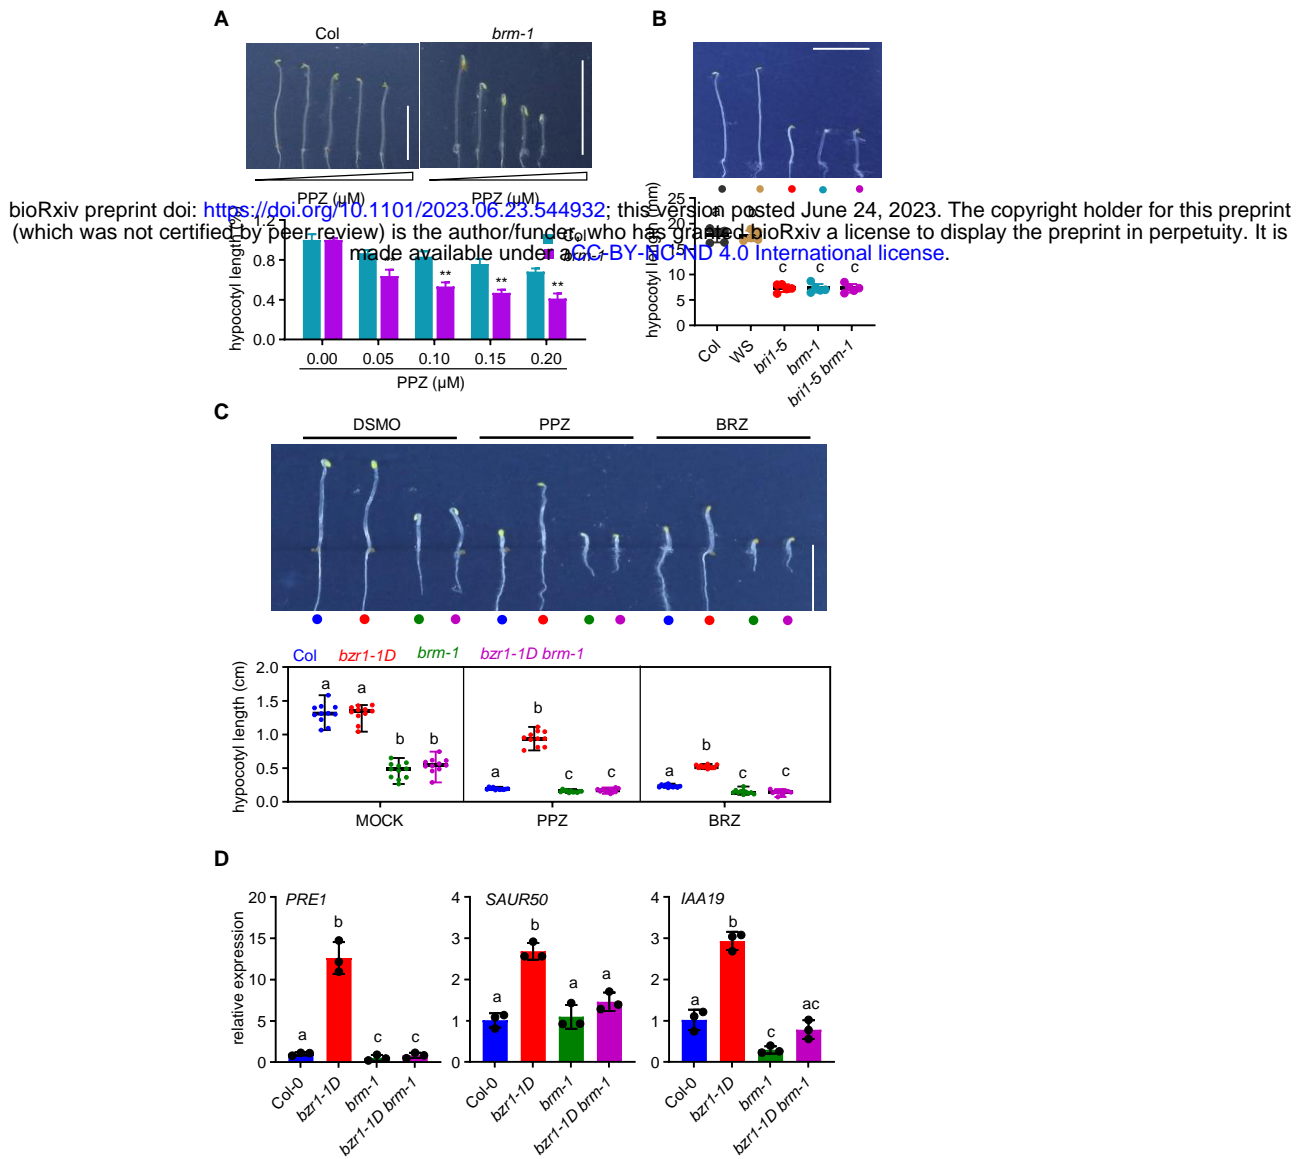

**Fig. 6. Loss of BRM compromises the elongation of hypocotyl and downregulates cell elongation related genes.**

(A) The *brm-1* mutant is hypersensitive to PPZ. Seedlings were grown on various concentrations of PPZ in the dark for five days. The error bars in the lower graph indicate the s.d. ( $n = 10$  plants) and  $**p < 0.01$ . Scale bar, 10 mm. (B) The loss of BRM inhibits the promotion of hypocotyl elongation. Seedlings were grown in the dark for five days. The error bars in the lower graph indicate the s.d. ( $n = 10$  plants). Lowercase letters indicate statistical significance determined by the Student's *t* test. Scale bar, 10 mm. (C) *bzl1-1D* under the *brm-1* background cannot promote hypocotyl elongation in the dark. Seedlings were grown on medium either with DMSO or 2  $\mu\text{M}$  PPZ or 2  $\mu\text{M}$  BRZ in the dark for five days. The error bars in the lower graph indicate the s.d. ( $n = 10$  plants). Scale bar, 10 mm. (D) Relative expression of *PRE1*, *SAUR50* and *IAA19* in 5-day-old seedlings grown in dark conditions. *ACTIN2* served as the internal control. Mean  $\pm$  s.d. from three biological replicates. Lowercase letters indicate statistical significance determined by the Student's *t* test.

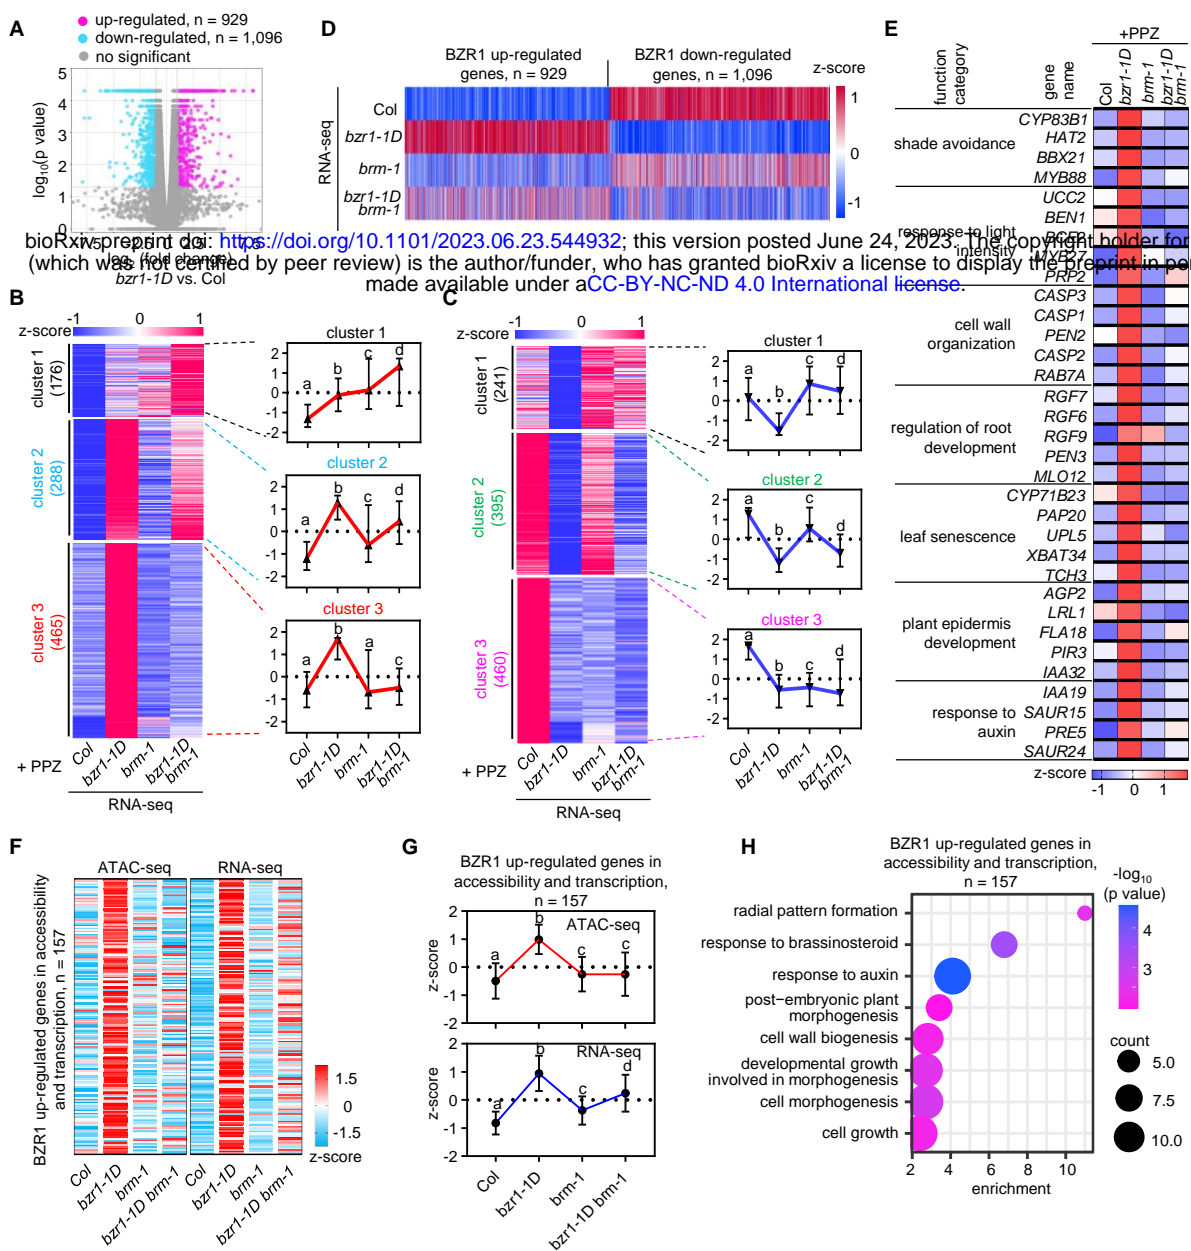

**Fig. 7. BRM determines BR-mediated gene activation, but has no effect on BR-mediated gene repression to a large extent.**

(A) Volcano plots showing differentially expressed genes in the *bZR1-1D* mutants, determined by RNA-seq.  $|\log_2(\text{fold change})| \geq 1$ . (B) Heatmap (left) and box blot (right) showing the classes of BZR1 up-regulated genes sorted by k-means clustering across the samples collected from Col, *bZR1-1D*, *brm-1*, *bZR1-1D brm-1* samples. Color bar, RNA z-score of the differentially expressed genes identified by RNA-seq. The number of the genes for each cluster is given. (C) Heatmap (left) and box blot (right) showing the classes of BZR1 down-regulated genes sorted by k-means clustering across the samples collected from Col, *bZR1-1D*, *brm-1*, *bZR1-1D brm-1* samples. Color bar, RNA z-score of the differentially expressed genes identified by RNA-seq. The number of the genes for each cluster is given. (D) Heatmaps reflecting the relative expression (z-normalized) of BZR1 up or down-regulated genes for the indicated RNA-seq experiments. (E) Comparative expression analyses of BRM-dependent BZR1 up-regulated genes in diverse developmental programmes. Heatmap of RNA-seq data from triplicate biological samples prepared from Col, *bZR1-1D*, *brm-1*, *bZR1-1D brm-1* seedlings. (F) Heat map displaying the chromatin accessible and transcriptional relative level (z-normalized) at BZR1 up-regulated genes in both transcription and chromatin accessibility for indicated samples. z-score values of chromatin accessibility and gene expression in indicated samples were also displayed. (G) Box blot displaying the chromatin accessible and transcriptional relative level (z-normalized) at BZR1 up-regulated genes in both transcription and chromatin accessibility for indicated samples. (H) Gene ontology analysis using 157 genes in F.

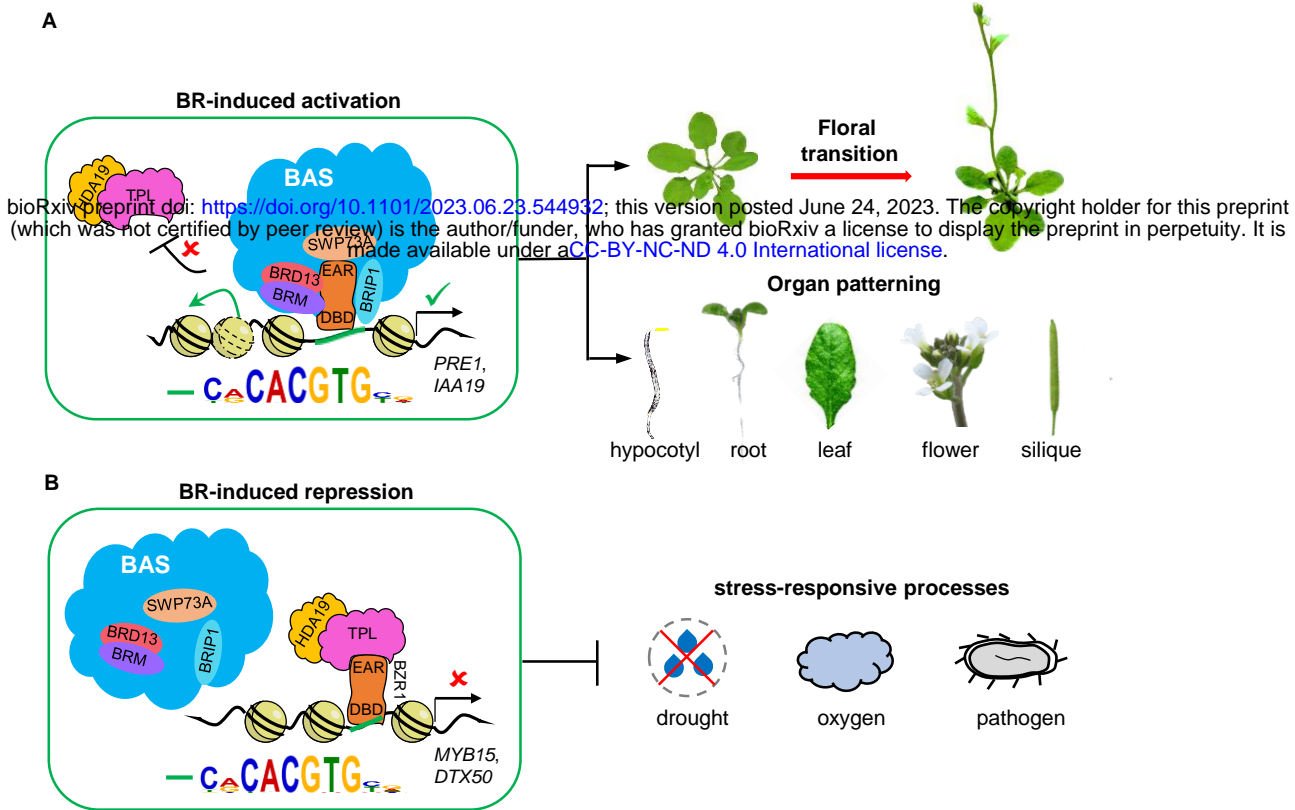

**Fig. 8. Model of the BR-BZR1-BAS signaling network governing diverse developmental programs.**

(A) The BR-BZR1-BAS-mediated transcriptional activation signaling network. BR-activated BZR1 interacts with and recruits the BAS complexes to the G-box-like containing genes, where BAS enhances chromatin accessibility and activate gene expression to support a range of plant growth and developmental processes, including fruit and seed development, hypocotyl elongation, root growth, leaf expansion, flowering transition, and floral organ formation. This molecular mechanism establishes a direct and global mechanistic connection between hormones and chromatin accessibility during plant growth and development process. (B) The BR-BZR1-TPL-HDA19-mediated transcriptional repression signaling network. BZR1-TPL-HDA19 complexes bind to the G-box-like motifs in the stress-responsive genes and inhibit their expression to help balance the trade-off between growth and stress response.

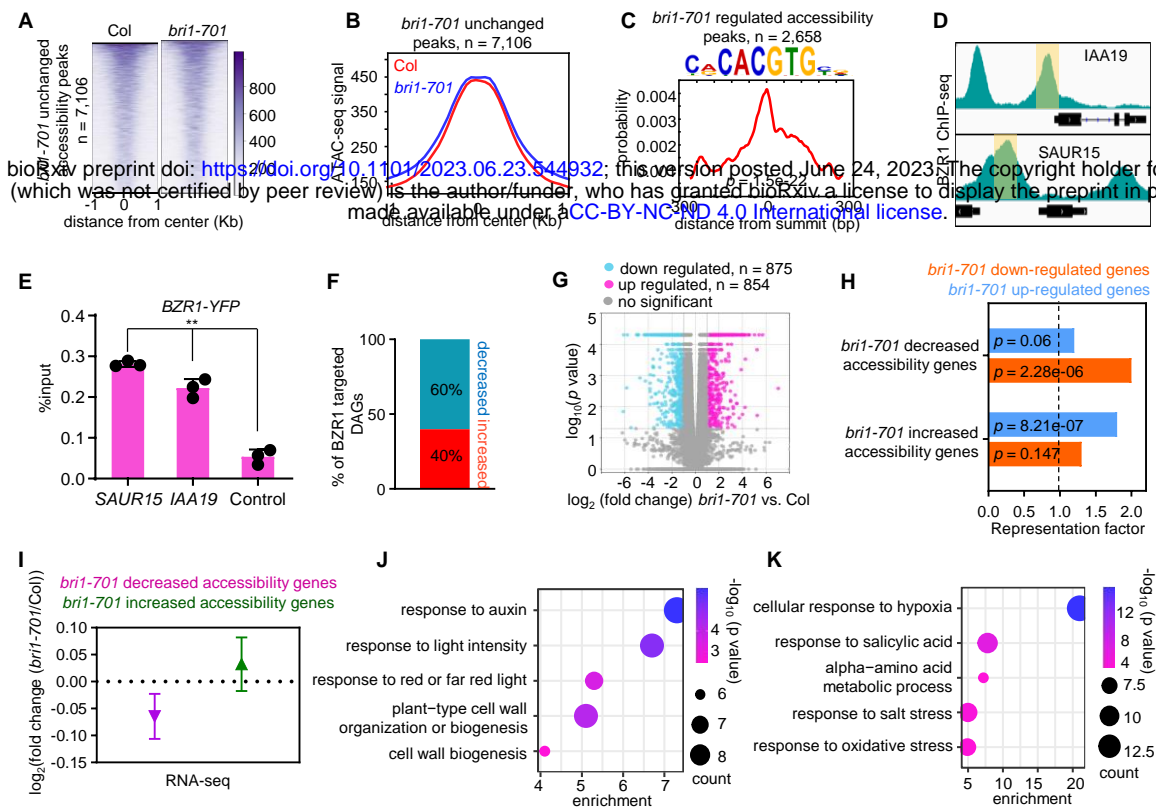

**Fig. S1. Genome-wide changes of chromatin accessibility and RNA transcription in the loss of BR signaling.** (A), (B) Heatmap (A) and metagenes plots (B) reflecting the ATAC-seq signals over the unchanged chromatin accessibility sites for the indicated ATAC-seq experiments. (C) The G-Box element is significantly enriched in *bri1-701* regulated accessibility peaks. (D) IGV view of BZR1 ChIP-seq at the known BZR1-targeted genes. The black diagrams underneath indicate gene structure. The y-axis scales represent shifted merged MACS2 tag counts for every 10-bp window. (E) Validation of the occupancy at the selected sites by ChIP-qPCR in the indicated transgenic plants. Mean  $\pm$  s.d. from three biological replicates. Statistical significance was determined by two-tailed Student's t-test; \*\*  $p < 0.01$ . (F) The percentage of BZR1 targeted genes showing decreased and increased chromatin accessibility in the *bri1-701* mutants. (G) Volcano plots showing differentially expressed genes ( $|\log_2(\text{fold change})| \geq 1$ ) in the *bri1-701* mutants, determined by RNA-seq. (H) Overlap analysis of genes showing down-regulated and up-regulated in chromatin accessibility and RNA expression in the *bri1-701* mutants. The x axis represents the observed/expected score. The  $p$  values were calculated by hypergeometric tests. (I) Box plot depicts the  $\log_2(\text{fold change})$  in RNA-seq for *bri1-701* decreased chromatin accessibility genes and *bri1-701* increased chromatin accessibility genes. (J) Gene ontology analysis of genes showing down-regulated in chromatin accessibility and genes expression in the *bri1-701* mutants. (K) Gene ontology analysis of genes showing up-regulated in chromatin accessibility and gene expression in the *bri1-701* mutants.

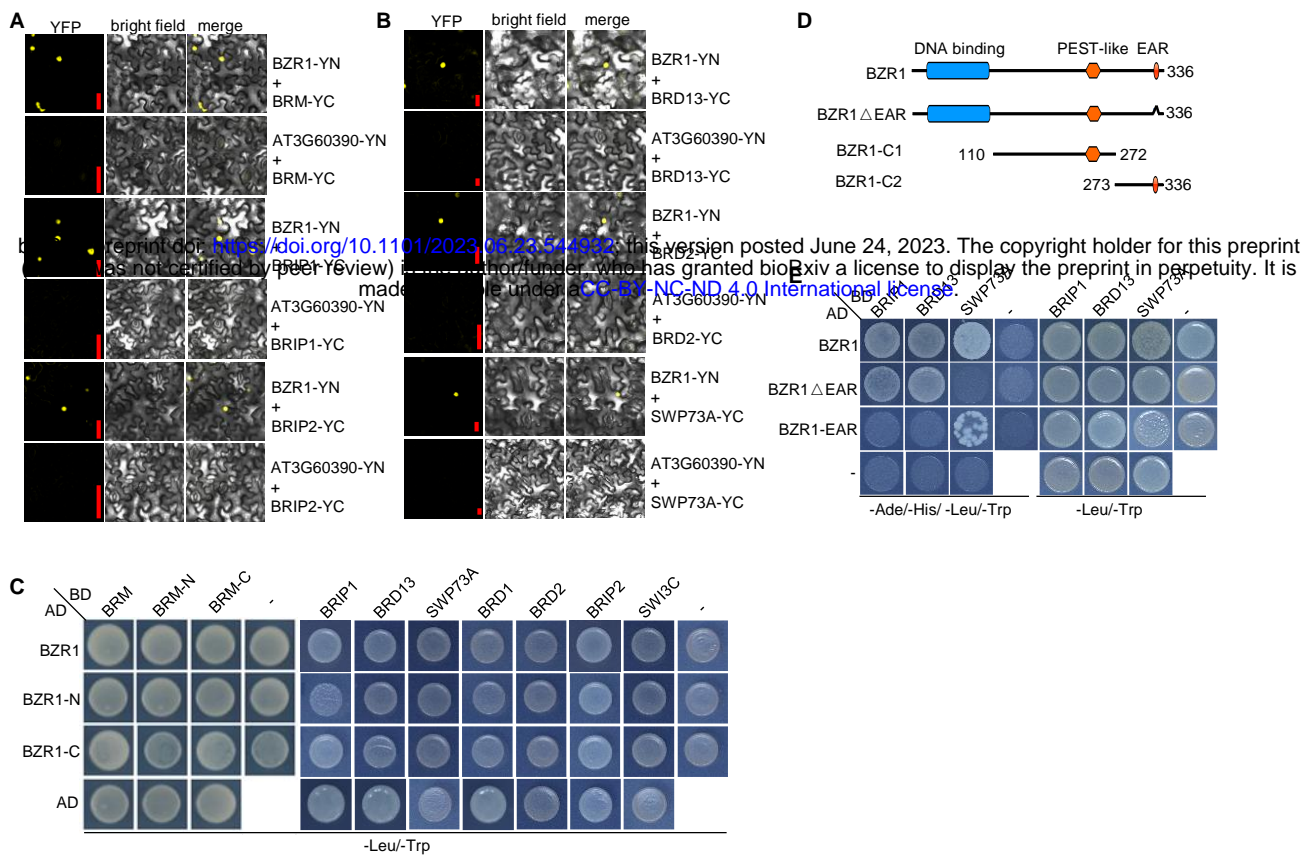

**Fig. S2. Physical association of BZR1 and BAS complex.** (A), (B) BiFC showing that BZR1 interact with BRM and core members of BAS complex. An unrelated nuclear protein encoded by *AT3G60390* was used as a negative control. error bar = 20  $\mu$ m. (C) Yeast two-hybrid assays to examine BZR1 interact with BRM and core members of BAS complex. Yeast cells transformed with the indicated plasmids were plated onto quadruple dropout (Selective) (SC-Leu, -Trp) medium. AD, Activation Domain; BD, Binding Domain. (D) Schematic illustration of the BZR1 and its truncated versions. (E) Yeast two-hybrid assays to examine EAR domain of BZR interacts with SWP73A. Yeast cells transformed with the indicated plasmids were plated onto quadruple dropout (Selective) (SC- Ade, - His, -Leu, -Trp) medium. AD, Activation Domain; BD, Binding Domain.

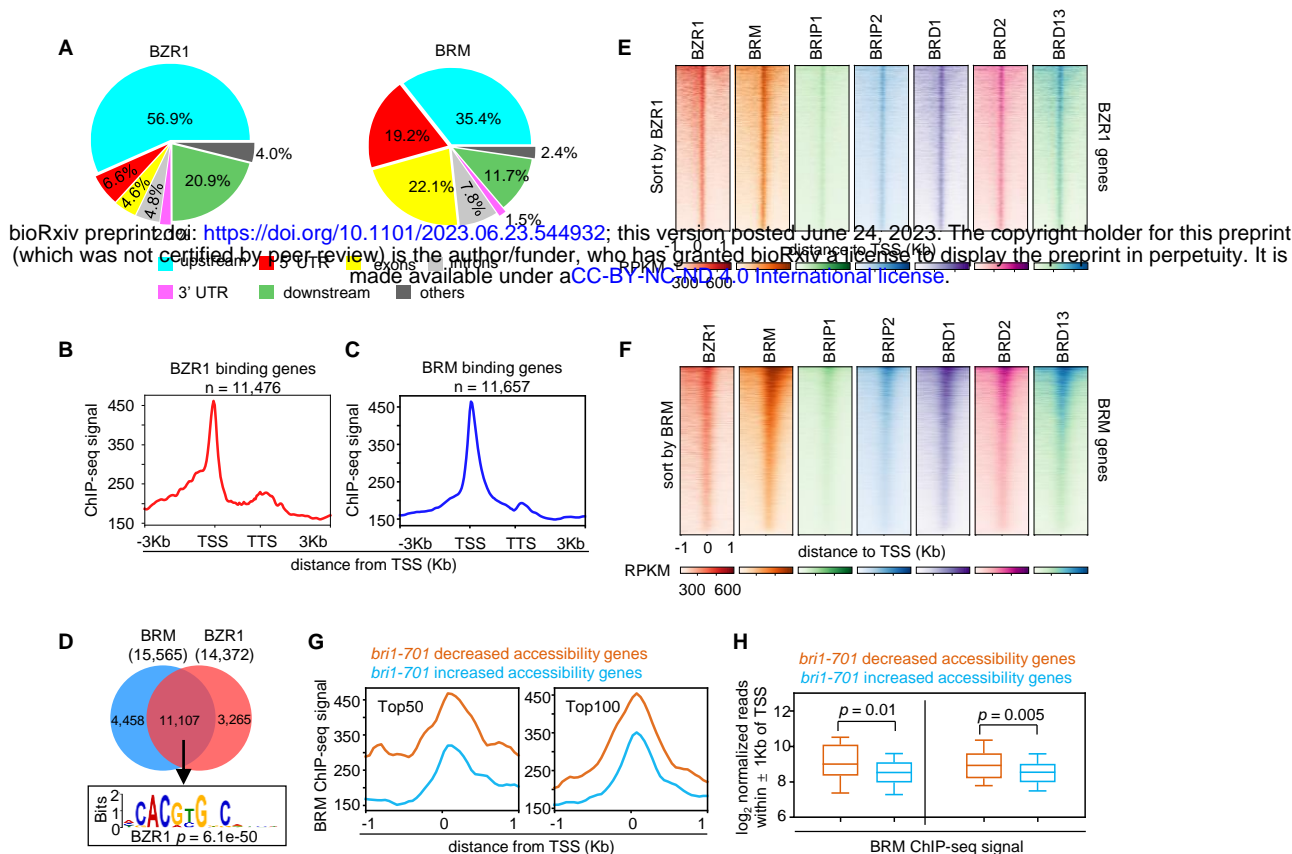

**Fig. S3. BZR1 and BRM co-occupancy.** (A) Pie charts showing the distribution of BZR1 and BRM peaks at genic and intergenic regions in the genome. (B), (C) The average enrichment of BZR1 or BRM over its target genes. Plotting regions were scaled to the same length as follows: 5' ends (-3.0 kb to transcription starting site (TSS)) and 3' ends (transcription stop site (TTS) to downstream 3.0 kb), and the gene body was scaled to 2.0 kb. (D) The G-Box has a significant enrichment in the BRM and BZR1 overlapped MACS-called peaks. (E) Heatmap representations of ChIP-seq of BZR1, BRM, BRIP1/2, and BRD1/2/3. Rank order is from highest to lowest BZR1 signal.  $\log_2$  enrichment was normalized to reads per genome coverage. Read counts per gene were averaged in 50-nucleotide (nt) bins. (F) Heatmap representations of ChIP-seq of BZR1, BRM, BRIP1/2, and BRD1/2/3. Rank order is from highest to lowest BRM signal.  $\log_2$  enrichment was normalized to reads per genome coverage. Read counts per gene were averaged in 50-nucleotide (nt) bins. (G) Metagene plots displaying the ChIP-seq signals of BRM at the TSS of 50 genes (top 50) or 100 genes (top 100) showing decreased or increased accessibility in the *bril-701* mutants. (H) Box plots displaying read counts for the BRM ChIP-seq data at *bril-701* decreased or increased accessibility genes. Reads were summed  $\pm 1$  kb from the TSS. Significance analysis was determined by two tailed Mann-Whitney U test.

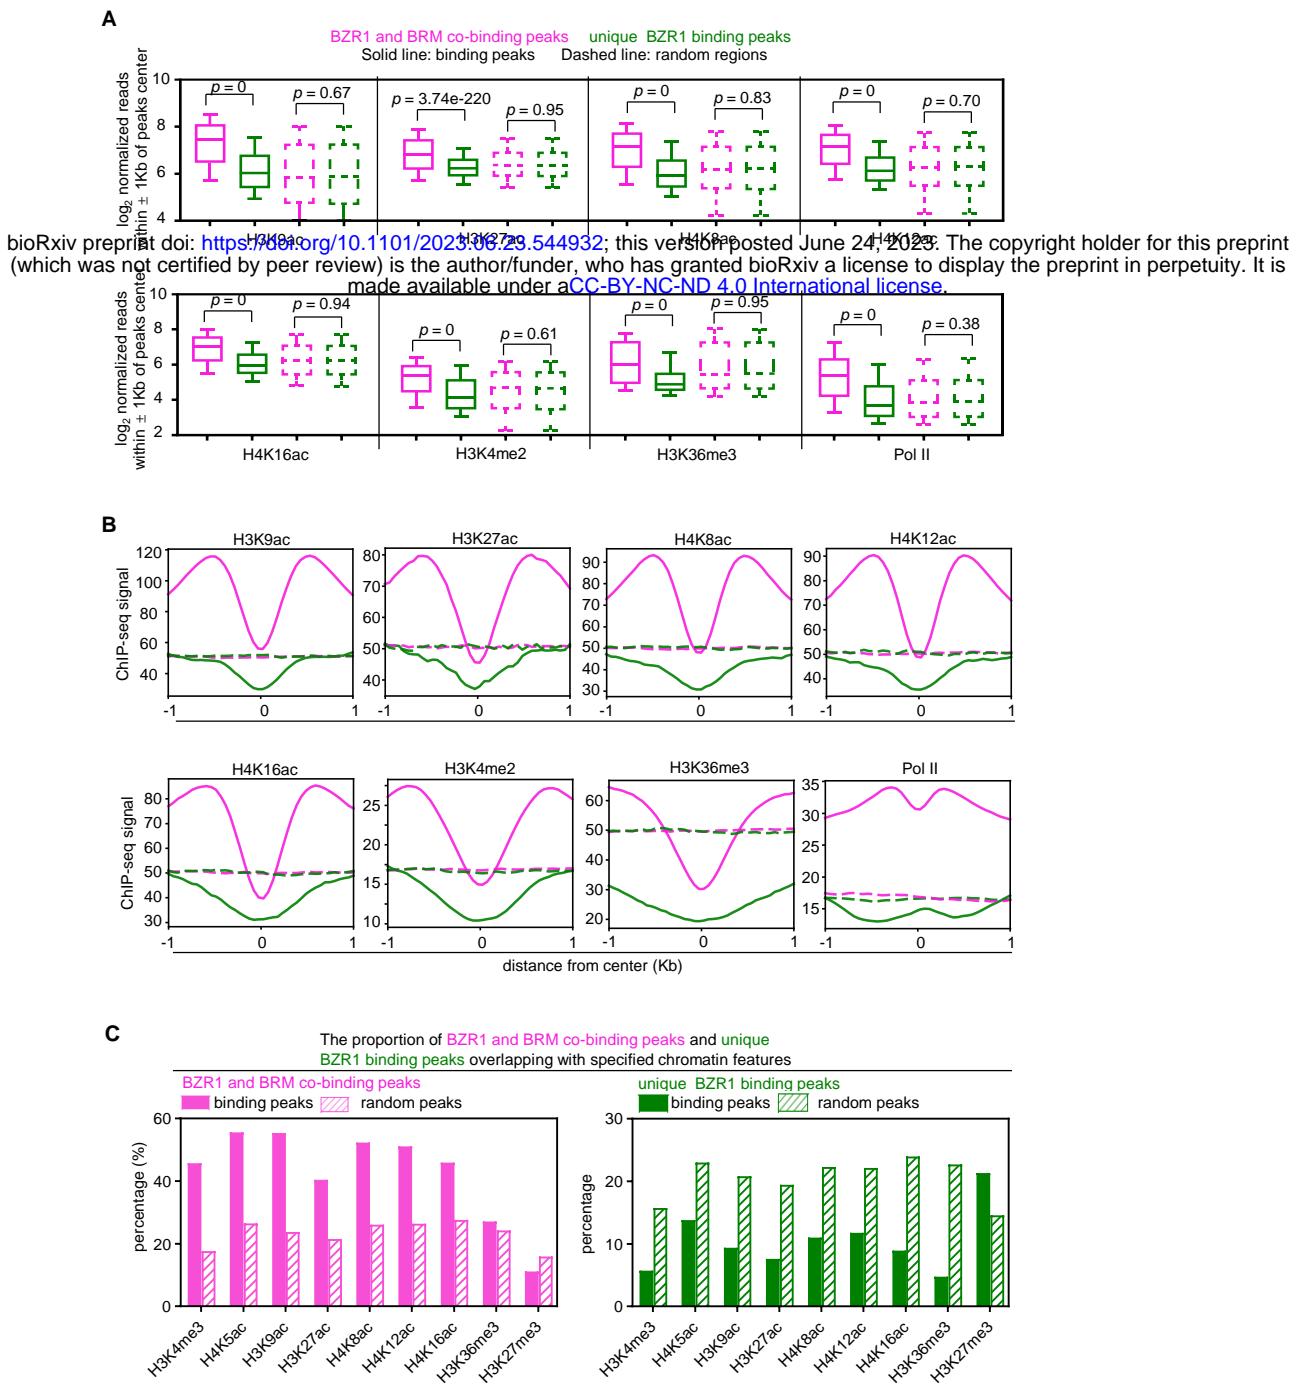

**Fig. S4. Metagene plots displaying the ChIP-seq signals of different histone modifications at BZR1 and BRM co-binding peaks or unique BZR1 binding peaks.** (A) Box plots displaying read counts at BZR1 and BRM co-binding peaks or unique BZR1 binding peaks for the H3K9ac, H3K27ac, H4K8ac, H4K12ac, H4K16ac, H3K4me2, H3K36me3, and Pol II ChIP-seq data. Reads were summed  $\pm$  1 kb from the peak center. Significance analysis was determined by two tailed Mann-Whitney U test. (B) Metagene plots displaying the ChIP-seq signals of H3K9ac, H3K27ac, H4K8ac, H4K12ac, H4K16ac, H3K4me2, H3K36me3, and Pol II at BZR1 and BRM co-binding peaks or unique BZR1 binding peaks. (C) The proportion of at BZR1 and BRM co-binding peaks or unique BZR1 binding genes overlapping with specified chromatin features.

bioRxiv preprint doi: <https://doi.org/10.1101/2023.06.23.544932>; this version posted June 24, 2023. The copyright holder for this preprint (which was not certified by peer review) is the author/funder, who has granted bioRxiv a license to display the preprint in perpetuity. It is made available under aCC-BY-NC-ND 4.0 International license.

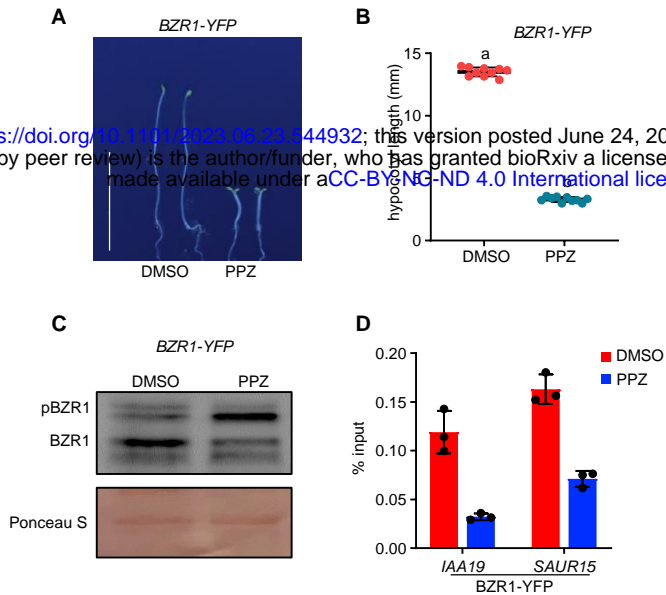

**Fig. S5. The occupancy of BZR1 is decreased with PPZ treatment.** (A), (B) Hypocotyl elongation phenotypes of *BZR1-YFP* seedlings were shown in dark for 5 days on 1/2 MS medium with DMSO or 2  $\mu$ M PPZ. The hypocotyl lengths of the indicated genotypes were measured and are shown in B. Data are means  $\pm$  SD. n=10. Scale bars, 10 mm. (C) Immunoblot analysis showing the relative protein levels of BZR1 with treatment of DMSO or 2 $\mu$ M PPZ. (D) Validation of BZR1 enrichment at *IAA19* and *SAUR15* loci by ChIP-qPCR with treatment of DMSO or 2 $\mu$ M PPZ.



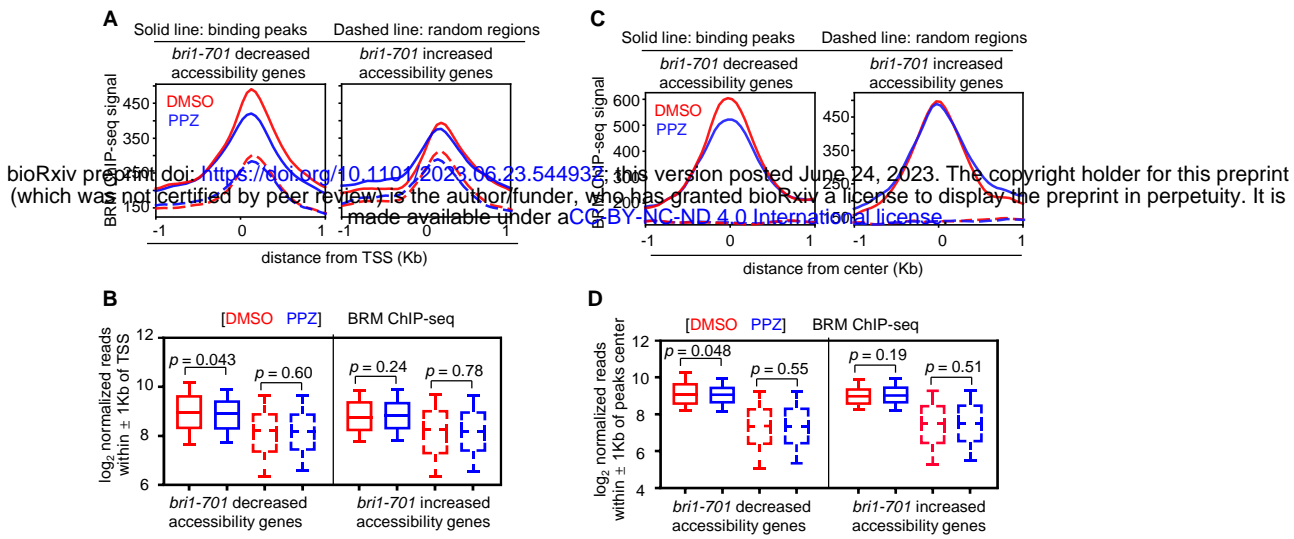

**Fig. S6. BR enhances BRM enrichment signal at *bri1-701* decreased accessibility sites.** (A) Metagenic plots displaying the ChIP-seq signals of BRM at the TSS of *bri1-701* decreased or increased accessibility genes. (B) Box plots displaying read counts for the BRM ChIP-seq data at *bri1-701* decreased or increased accessibility genes. Reads were summed  $\pm 1$  kb from the TSS. Significance analysis was determined by two tailed Mann-Whitney U test. (C) Metagenic plots displaying the ChIP-seq signals of BRM binding peaks at *bri1-701* decreased or increased accessibility genes. (D) Box plots displaying read counts for the BRM ChIP-seq data at *bri1-701* decreased or increased accessibility genes. Reads were summed  $\pm 1$  kb from the peaks center. Significance analysis was determined by two tailed Mann-Whitney U test.

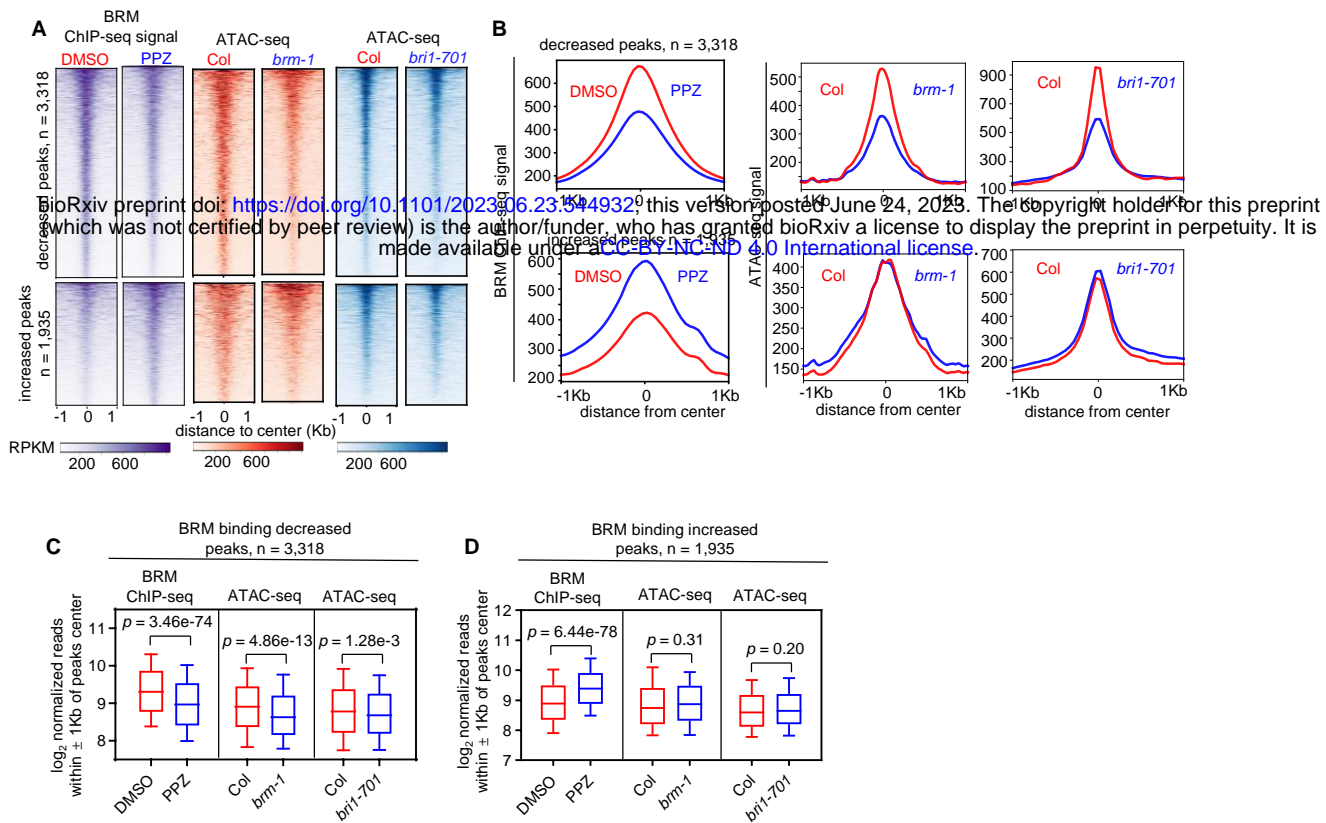

**Fig. S7. *brm-1* and *bri1-701* showed a similar decline in accessibility at BRM binding decreased sites.** (A), (B) Heatmap (A) and metagenes plots (B) reflecting the ChIP-seq signals and ATAC-seq signal at the decreased, or increased BRM binding sites. (C), (D) Box plots displaying read counts for the BRM ChIP-seq or ATAC-seq data at BRM binding decreased or BRM binding increased peaks. Reads were summed  $\pm 1$  Kb from the peaks center. Significance analysis was determined by two tailed Mann-Whitney U test.

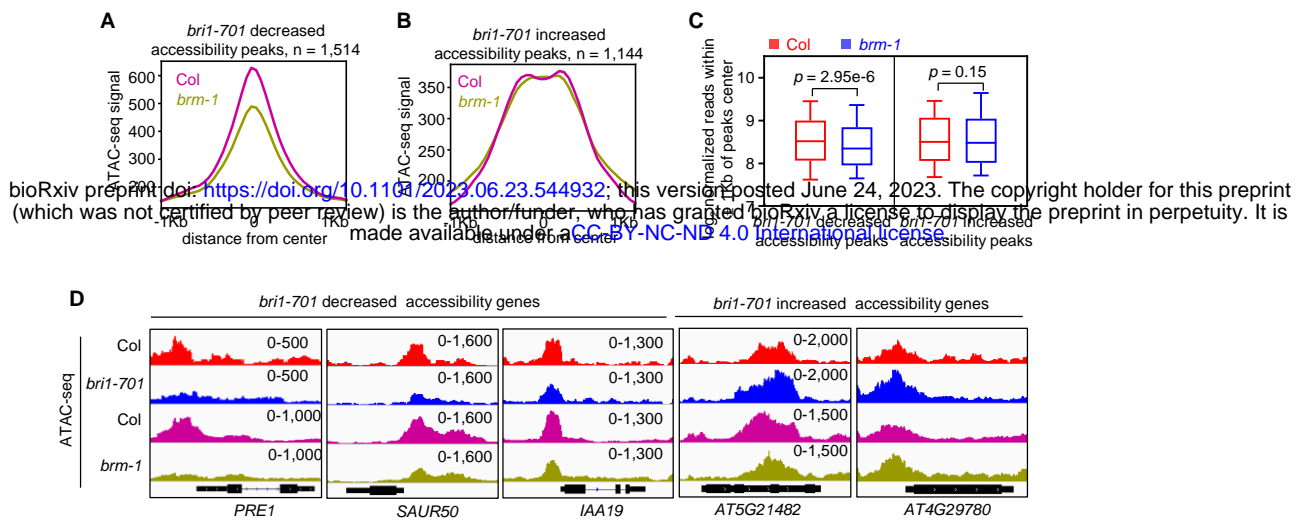

**Fig. S8. The loss of BRM results in a decline in chromatin accessibility at *bri1-701* decreased accessibility sites.** (A, B) Metagene plots reflecting the ATAC-seq signals over the *bri1-701* decreased or increased chromatin accessibility sites for the indicated ATAC-seq experiments. (C) Box plot displaying read counts over the decreased or increased chromatin accessibility sites for the indicated ATAC-seq experiments. Reads were summed  $\pm$  1 kb from the peaks center. Significance analysis was determined by two tailed Mann-Whitney U test. (D) Examples of ATAC-seq tracks at representative loci in the Col, *bri1-701* and *brm-1* mutants.

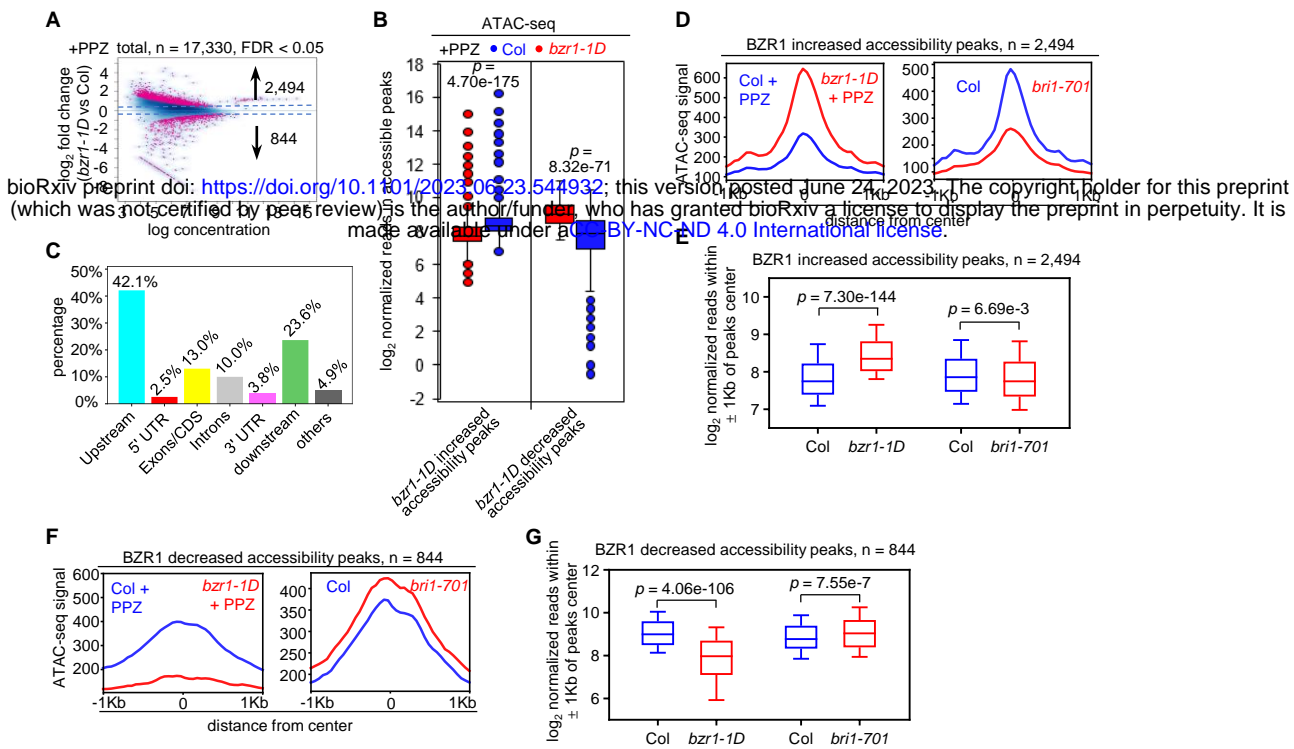

**Fig. S9. *bzr1-1D* rescues the changes of chromatin accessibility with treatment of PPZ.** (A) Scatter plot showing fold-change ( $|\log_2$  fold change|  $\geq 0.4$ ) of accessible peaks between WT and *bzr1-1D*. Blue dots, stable peaks; pink dots, differential peaks. The numbers of differentially accessible peaks (increased or decreased) according to FDR are indicated. (B) Box plots showing read counts at regions that had increased and decreased accessibility in *bzr1-1D* for the indicated ATAC-seq experiments. Significance analysis was determined by two tailed Mann-Whitney U test. (C) Bar chart showing the distribution of changed chromatin accessible peaks in the *bzr1-1D* mutants at genic and intergenic regions in the genome. (D), (E) Metagene plots and box plot reflecting the ATAC-seq signals over the BZR1 increased chromatin accessibility regions for the indicated assays. Significance analysis was determined by two tailed Mann-Whitney U test. (F), (G) Metagene plots and box plot reflecting the ATAC-seq signals over the BZR1 decreased chromatin accessibility regions for the indicated assays. Significance analysis was determined by two tailed Mann-Whitney U test.

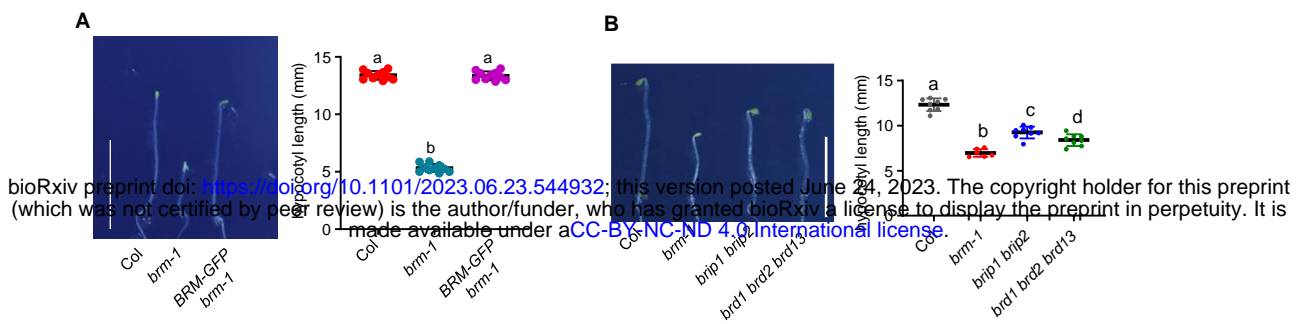

**Fig. S10. Loss of BAS complex reduces hypocotyl elongation. (A)** The hypocotyl elongation phenotype of indicated lines grown in dark for five days. The error bars in the right graph indicate the s.d. ( $n = 10$  plants). Lowercase letters indicate statistical significance determined by the Student's *t* test. Scale bars, 10 mm. **(B)** The loss of core subunits of MAS inhibits the promotion of hypocotyl elongation. Seedlings were grown in the dark for five days. Lowercase letters indicate statistical significance determined by the Student's *t* test. Scale bar, 10 mm.
